GM-CSF and HIF-1 $\alpha$  mediate IFN- $\gamma$ -independent control of *Mtb*

1 **IFN- $\gamma$ -independent control of *M. tuberculosis* requires CD4 T cell-derived GM-CSF and**  
2 **activation of HIF-1 $\alpha$**

3

4 Erik Van Dis<sup>a,+</sup>, Huntly M Morrison<sup>a</sup>, Daniel M Fines<sup>a</sup>, Janet Peace Babirye<sup>a</sup>, Lily H McCann<sup>b</sup>,  
5 Sagar Rawal<sup>b</sup>, Jeffery S Cox<sup>a</sup>, and Sarah A Stanley<sup>a,b,#</sup>

6

7 <sup>a</sup>Department of Molecular and Cell Biology, Division of Immunology and Pathogenesis,  
8 University of California, Berkeley, Berkeley, California, USA

9 <sup>b</sup>School of Public Health, Division of Infectious Diseases and Vaccinology, University of  
10 California, Berkeley, Berkeley, California, USA

11 <sup>+</sup>Current address: Departments of Immunology and Medicine, University of Washington, Seattle,  
12 Washington, USA

13 <sup>#</sup>Corresponding author, [sastanley@berkeley.edu](mailto:sastanley@berkeley.edu)

14 **Abstract**

15 The prevailing model of protective immunity to tuberculosis is that CD4 T cells produce the  
16 cytokine IFN- $\gamma$  to activate bactericidal mechanisms in infected macrophages. Recent evidence  
17 has expanded this model, and it is now clear that CD4 T cells can control *M. tuberculosis*  
18 infection in the absence of IFN- $\gamma$  production. To identify factors and pathways involved in IFN- $\gamma$ -  
19 independent control, we developed a co-culture model using CD4 T cells isolated from the lungs  
20 of infected mice and *M. tuberculosis*-infected murine bone marrow-derived macrophages  
21 (BMDMs). We show that IFN- $\gamma$ -independent control is primarily mediated by CD4 T cell  
22 production of the cytokine GM-CSF and requires activation of the macrophage transcription  
23 factor HIF-1 $\alpha$ . HIF-1 $\alpha$  activation drives a metabolic shift toward aerobic glycolysis and leads to  
24 the production of lipid droplets, both of which support host defense against infection.  
25 Surprisingly, recombinant GM-CSF is insufficient to rescue the absence of control by GM-CSF-  
26 deficient CD4 T cells during co-culture with BMDMs. In peritoneal macrophages, GM-CSF is  
27 sufficient to control growth, induces lipid droplet biogenesis, and requires HIF-1 $\alpha$  expression for  
28 control. While HIF-1 $\alpha$ -mediated control following IFN- $\gamma$  stimulation requires nitric oxide, we find  
29 that HIF-1 $\alpha$  activation by CD4 T cells and recombinant GM-CSF is nitric oxide-independent,  
30 implying a distinct pathway of activation. In addition to GM-CSF, CD4 T cells produce a factor  
31 that helps maintain phagosome membrane integrity during infection and blocks bacterial access  
32 to host lipids, a primary nutrient source. These results advance our understanding of CD4 T cell-  
33 mediated immunity to *M. tuberculosis*, clarify the role of nitric oxide as primarily  
34 immunomodulatory during *M. tuberculosis* infection, and reveal a novel mechanism for the  
35 activation of HIF-1 $\alpha$ . Furthermore, we establish a previously unknown functional link between  
36 GM-CSF and HIF-1 $\alpha$  and provide evidence that CD4 T cell-derived GM-CSF is a potent  
37 bactericidal effector.

38 **Keywords:** *Mycobacterium tuberculosis*, CD4 T cells, macrophages, HIF-1 $\alpha$ , GM-CSF

## 39 **Introduction**

40 Research into host immunity to *Mycobacterium tuberculosis* infection has the potential to  
41 improve the lives of billions of people around the world, yet major features of the immune  
42 response to tuberculosis (TB) remain poorly understood. Broadly, immunity to TB begins with an  
43 innate response that induces inflammation and the recruitment of phagocytes, followed by an  
44 adaptive response necessary to control infection. A critical aspect of this adaptive immune  
45 response is the activation and proliferation of *M. tuberculosis* specific CD4 T cells. Mice  
46 deficient in CD4 T cells are highly susceptible to TB, and the loss of CD4 T cells in patients  
47 suffering from AIDS is strongly correlated with re-activation of dormant *M. tuberculosis* infection  
48 (1, 2). The cytokine interferon (IFN)- $\gamma$  is also required for control of TB. Mice deficient for IFN- $\gamma$   
49 signaling are among the most susceptible strains to *M. tuberculosis* infection, and recombinant  
50 IFN- $\gamma$  activates the bactericidal capacity of macrophages (3-6). The known importance of CD4 T  
51 cells and IFN- $\gamma$  has led to an enduring tenet of TB immunity: that CD4 T cells secrete IFN- $\gamma$  to  
52 control *M. tuberculosis* growth in infected macrophages (7).

53

54 This basic understanding of protective immunity to TB has come under increasing scrutiny.  
55 Comparing different routes of inoculation with the vaccine strain *M. bovis* bacille Calmette–  
56 Guérin in mice shows that the frequency of IFN- $\gamma$ -secreting CD4 T cells correlates more closely  
57 with disease severity than with protection from TB disease after *M. tuberculosis* challenge (8),  
58 and human trials with the vaccine candidate MVA85A showed that although this vaccine elicits  
59 significant numbers of IFN- $\gamma$ -secreting CD4 T cells it does not lead to enhanced protection  
60 against infection (9, 10). Furthermore, while CD4 T cells are clearly important for TB control in  
61 humans, inherited mutations in components of the IFN- $\gamma$  signaling pathway are not generally  
62 associated with susceptibility to *M. tuberculosis* but rather with enhanced susceptibility to non-  
63 tuberculosis mycobacteria such as *M. chelonae*, *M. smegmatis*, and *M. scrofulaceum* (11).

64 Basic research into immunity to TB has corroborated and expanded upon these findings.  
65 Adoptive transfer experiments in mice show that IFN- $\gamma$ -deficient CD4 T cells can control *M.*  
66 *tuberculosis in vivo* (1, 12, 13) with IFN- $\gamma$  production accounting for only 30% of CD4 T cell-  
67 mediated control in the lungs (13). Collectively, these findings point to an important unknown  
68 mechanism of control mediated by CD4 T cells that is independent of IFN- $\gamma$ .

69  
70 Immune resistance to TB requires a fine balance between pro-inflammatory effectors that  
71 control bacterial replication and anti-inflammatory immune regulation that prevents  
72 immunopathology. CD4 T cells themselves contribute to both of these arms, secreting pro-  
73 inflammatory molecules such as IFN- $\gamma$  and TNF $\alpha$  and anti-inflammatory cytokines including IL-  
74 10 and TGF- $\beta$ , complicating the interpretation of adoptive transfer experiments. Whether control  
75 by IFN- $\gamma$ -deficient CD4 T cells following adoptive transfer is due to immunoregulatory effects or  
76 to the antibacterial effects of a specific IFN- $\gamma$ -independent effector remains an open question.  
77 Thus far, adoptive transfer experiments have precluded a role for CD4 T cell expression of  
78 TNF $\alpha$ , Fas and perforin in IFN- $\gamma$ -independent control (12), and have not demonstrated that a  
79 CD4 T cell-derived IFN- $\gamma$ -independent effector can stimulate cell-intrinsic control of bacterial  
80 replication.

81  
82 Recently, the cytokine granulocyte-macrophage colony-stimulating factor (GM-CSF) was shown  
83 to have a potential role in CD4 T cell-mediated control of TB. Recombinant GM-CSF (rGM-CSF)  
84 controls *M. tuberculosis* growth in mouse peritoneal macrophages and human monocytes, and  
85 GM-CSF-deficient (*Csf2*<sup>-/-</sup>) mice have significantly higher bacterial burden in the lungs compared  
86 to wild-type and succumb more rapidly to infection (14-16). However, *Csf2*<sup>-/-</sup> mice and humans  
87 with inherited mutations in the GM-CSF receptor have a defect in alveolar macrophage  
88 development which complicates the interpretation of whole-animal knockout experiments (17,

89 18). Finally, adoptive transfer experiments show that *Csf2*<sup>-/-</sup> CD4 T cells only exhibit less control  
90 than wild-type when transferred into mice deficient for GM-CSF (15), so it remains unclear  
91 whether CD4 T cell production of GM-CSF induces macrophage-intrinsic control of *M.*  
92 *tuberculosis*.

93  
94 In this study, we use an *in vitro* co-culture system to determine whether an IFN- $\gamma$ -independent  
95 CD4 T cell effector can induce cell intrinsic control of *M. tuberculosis* replication. We show that  
96 lung-derived CD4 T cells and multiple *in vitro*-differentiated T cell subsets exhibit IFN- $\gamma$ -  
97 independent control in infected macrophages via a secreted and proteinaceous effector, and we  
98 use RNA sequencing and cytokine profiling to investigate possible mechanisms. Like IFN- $\gamma$ -  
99 mediated control, IFN- $\gamma$ -independent control by CD4 T cells requires macrophage expression of  
100 the transcription factor hypoxia inducible factor-1 $\alpha$  (HIF-1 $\alpha$ ), activation of which leads to a  
101 metabolic switch to aerobic glycolysis and the formation of macrophage lipid droplets to control  
102 bacterial growth. These changes occur independent of the IFN- $\gamma$ -induced second messenger  
103 nitric oxide (NO)—normally required for HIF-1 $\alpha$  activation during *M. tuberculosis* infection—  
104 indicating a novel mechanism of HIF-1 $\alpha$  activation. Furthermore, we show that while there is no  
105 role for CD4 T cell production of TNF $\alpha$ , Type I IFN, CD153 (*Tnfsf8*) or CD40, CD4 T cell  
106 secretion of GM-CSF is required for IFN- $\gamma$ -independent control. Recombinant GM-CSF is  
107 sufficient to control *M. tuberculosis* in mouse peritoneal macrophages, requires HIF-1 $\alpha$   
108 expression for control and correlates with the production of macrophage lipid droplets. However,  
109 GM-CSF is insufficient for control in bone marrow-derived macrophages (BMDMs) and,  
110 surprisingly, does not rescue the loss of IFN- $\gamma$ -independent control by GM-CSF-deficient CD4 T  
111 cells, indicating either differences in recombinant and CD4 T cell-derived GM-CSF function or  
112 an unknown second CD4 T cell effector necessary for GM-CSF-mediated control in BMDMs.  
113 These results advance our understanding of CD4 T cell-mediated control of *M. tuberculosis*,

114 establish CD4 T cell-derived GM-CSF as a potent bactericidal effector and, by uncovering a  
115 novel mechanism for HIF-1 $\alpha$  activation, emphasize the central importance of HIF-1 $\alpha$  for  
116 intracellular immunity to TB.  
117

118 **Results**

119 **Lung-derived and *in vitro*-differentiated CD4 T cells exhibit IFN- $\gamma$ -independent control of**

120 ***M. tuberculosis*.** To confirm that CD4 T cells can control *M. tuberculosis* independent of IFN- $\gamma$ ,

121 we cultured CD4 T cells derived from the lungs of infected mice with infected *Ifngr*<sup>-/-</sup> BMDMs and

122 observed dose-dependent IFN- $\gamma$ -independent control of bacterial growth (Fig 1A, S1A).

123 Similarly, CD4 T cells from the lungs of infected *Ifngr*<sup>-/-</sup> mice controlled bacterial growth during

124 co-culture with wild-type BMDMs (Fig 1B). Conditioned media from CD4 T cells and CD4 T cells

125 in transwells both controlled growth in *Ifngr*<sup>-/-</sup> BMDMs showing that IFN- $\gamma$ -independent control is

126 mediated by a secreted effector (Fig 1C, S1B). To ask whether a specific T cell subset is

127 sufficient for IFN- $\gamma$ -independent control, we *in vitro* differentiated Th1, Th2 and Th17.1 T cells

128 using *M. tuberculosis* specific TCR transgenic mice. Th1s restricted bacterial growth during co-

129 culture with *Ifngr*<sup>-/-</sup> BMDMs (Fig 1D), and supernatants from Th1s exhibited dose-dependent

130 IFN- $\gamma$ -independent control (Fig 1E, S1C, S1D). Supernatants from the closely related Th17.1 T

131 cell subset also demonstrated IFN- $\gamma$ -independent control (Fig 1E), while supernatants from Th2s

132 did not (Fig 1F). Taken together, these results show that lung-derived CD4 T cells and *in vitro*

133 differentiated Th1s and Th17.1s secrete an IFN- $\gamma$ -independent effector that induces cell-intrinsic

134 control of *M. tuberculosis*. To test whether this effector is amino acid-based, we treated Th1

135 supernatants with proteinase K and observed a loss of IFN- $\gamma$ -independent control (Fig 1G).

136 Thus, a proteinaceous effector secreted by CD4 T cells activates BMDMs to control *M.*

137 *tuberculosis* independent of IFN- $\gamma$ .

138

139 **IFN- $\gamma$ -independent control requires an NO-independent HIF-1 $\alpha$ -mediated shift to aerobic**

140 **glycolysis.** To identify macrophage signaling pathways induced by CD4 T cells independent of

141 IFN- $\gamma$ , we performed RNA sequencing on *M. tuberculosis*-infected wild-type and *Ifngr*<sup>-/-</sup> BMDMs

142 after 24 hours of co-culture with lung CD4 T cells. CD4 T cells induced differential regulation of

143 >1800 genes in wild-type BMDMs and >800 genes in *Ifngr*<sup>-/-</sup> BMDMs compared to untreated (Fig  
144 2A, 2B). Of these, 192 genes were altered in an IFN- $\gamma$ -independent manner, with differential  
145 expression in both wild-type and *Ifngr*<sup>-/-</sup> BMDMs during CD4 co-culture (Fig 2A). Using  
146 transcripts with >2-fold upregulation in both wild-type and *Ifngr*<sup>-/-</sup> BMDMs, gene ontology (GO)  
147 analysis revealed cytokine-mediated signaling, positive regulation of cytokine production, and  
148 inflammatory responses as the top three enriched GO terms following co-culture with CD4 T  
149 cells (19-21). During *M. tuberculosis* infection of macrophages, IFN- $\gamma$  signaling causes a  
150 metabolic switch to aerobic glycolysis that is required for IFN- $\gamma$ -mediated control (22).  
151 Interestingly, CD4 T cells also induced significant upregulation of genes associated with aerobic  
152 glycolysis and an increase in glucose uptake, both with and without IFN- $\gamma$  signaling (Fig 2C,  
153 S2A). Nitric oxide (NO) production by inducible nitric oxide synthase (iNOS) is required for the  
154 IFN- $\gamma$ -mediated shift to aerobic glycolysis, and iNOS-deficient (*Nos2*<sup>-/-</sup>) BMDMs have a defect in  
155 cell intrinsic control of *M. tuberculosis* following IFN- $\gamma$  signaling (23). To explore a role for NO in  
156 IFN- $\gamma$ -independent control, we first asked whether NO is produced during CD4 T cell co-culture.  
157 While NO is produced in abundance by IFN- $\gamma$ -activated BMDMs during *M. tuberculosis* infection,  
158 there is little to no NO production induced by CD4 T cells or Th1 supernatants in the absence of  
159 IFN- $\gamma$  signaling (Fig 2D, 2E). A low level of NO was detected during CD4 T cell co-cultures only  
160 when CD4 T cells themselves expressed iNOS, and this amount of CD4 T cell-derived NO does  
161 not contribute to control of bacterial growth in macrophages (Fig 2D, S2B). Therefore, IFN- $\gamma$ -  
162 independent control by lung CD4 T cells and *in vitro* differentiated Th1s is independent of NO.  
163  
164 IFN- $\gamma$  signaling stabilizes and activates the transcription factor HIF-1 $\alpha$  during *M. tuberculosis*  
165 infection (22). HIF-1 $\alpha$  is required for the IFN- $\gamma$ -mediated metabolic switch to aerobic glycolysis,  
166 and HIF-1 $\alpha$ -deficient (*Hif1a*<sup>-/-</sup>) BMDMs have a defect in IFN- $\gamma$ -mediated control (22). NO helps  
167 stabilize HIF-1 $\alpha$  and the two form a positive feedback loop that is necessary for the antibacterial



168 effect of IFN- $\gamma$  (23). Surprisingly, despite an absence of NO and IFN- $\gamma$  signaling, we observed  
169 significant upregulation of multiple HIF-1 $\alpha$  target genes in *Ifngr*<sup>-/-</sup> BMDMs during CD4 T cell co-  
170 culture (Fig 2F), and bioinformatic analysis revealed an overrepresentation of genes with  
171 predicted HIF-1 $\alpha$  binding sites upregulated in *Ifngr*<sup>-/-</sup> BMDMs (Fig S2C).

172

173 To explore a role for HIF-1 $\alpha$  in IFN- $\gamma$ -independent control, we treated *Ifngr*<sup>-/-</sup> BMDMs with Th1  
174 supernatants and observed stabilization of HIF-1 $\alpha$  by western blot (Fig 3A). As has been  
175 demonstrated for IFN- $\gamma$ -mediated HIF-1 $\alpha$  stabilization (22), this was dependent on a metabolic  
176 switch to aerobic glycolysis since concurrent treatment of Th1 supernatants with the glycolysis  
177 inhibitor 2-deoxy-D-glucose (2-DG) abolished HIF-1 $\alpha$  stabilization (Fig 3A). Importantly, *Ifng*<sup>-/-</sup>  
178 CD4 T cells did not control bacterial growth in *Hif1a*<sup>-/-</sup> BMDMs (Fig 3B) and 2-DG treatment  
179 partially reduced IFN- $\gamma$ -independent control by Th1 supernatants (Fig S3A). These results  
180 demonstrate that HIF-1 $\alpha$  stabilization and aerobic glycolysis are necessary for IFN- $\gamma$ -  
181 independent control of *M. tuberculosis* by CD4 T cells. Activation of HIF-1 $\alpha$  mediates lipid  
182 droplet (LD) biogenesis in *M. tuberculosis* infected BMDMs, which supports host immunity by  
183 serving as a platform for eicosanoid production (24). We observed a similar increase in the  
184 number and size of LDs between infected wild-type and *Ifngr*<sup>-/-</sup> BMDMs after treatment with Th1  
185 supernatants (Fig 3C-G, S3B). The observation that HIF-1 $\alpha$  activation and LD accumulation  
186 occur independent of IFN- $\gamma$  and NO during *M. tuberculosis* infection, and that HIF-1 $\alpha$  is required  
187 for IFN- $\gamma$ -independent control, solidifies HIF-1 $\alpha$  as a critical signaling node after CD4 T cell  
188 activation of infected macrophages and suggests that pathways of IFN- $\gamma$ -dependent and IFN- $\gamma$ -  
189 independent control by CD4 T cells converge on HIF-1 $\alpha$  activation.

190

191 **CD4 T cell-derived GM-CSF is necessary for IFN- $\gamma$ -independent control of *M. tuberculosis*.**

192 To determine which secreted effector is necessary for IFN- $\gamma$ -independent control, we performed

193 cytokine profiling of Th1 and Th17.1 supernatants (Fig 4A). Multiple inflammatory cytokines  
194 previously implicated in immune control of *M. tuberculosis* were identified, including TNF $\alpha$ , IFN-  
195  $\alpha$ , IL-1 $\beta$ , IFN- $\gamma$ , and GM-CSF. *Ifng*<sup>-/-</sup> CD4 T cells had no loss of control in co-culture with *Tnfr1*<sup>-/-</sup>  
196 */Tnfr2*<sup>-/-</sup> BMDMs compared to wild-type (Fig 4B), and Th1 supernatants had no loss of control in  
197 *Ifnar*<sup>-/-</sup>/*Ifngr*<sup>-/-</sup> BMDMs compared to *Ifngr*<sup>-/-</sup> BMDMs (Fig 4C). Additionally, blocking antibodies for  
198 CD40 had no effect on IFN- $\gamma$ -independent control by lung CD4 T cells (Fig S4A). Thus, IFN- $\gamma$ -  
199 independent CD4 T cell control of *M. tuberculosis* in BMDMs does not require TNF $\alpha$ , Type I IFN,  
200 or CD40. The CD4 T cell surface molecule CD30 ligand (*Tnfrsf8*) has been implicated in IFN- $\gamma$ -  
201 independent control of *M. tuberculosis in vivo* (25). However, we observed little to no expression  
202 of the gene for CD30 (*Tnfrsf8*) in BMDMs in the presence or absence of CD4 T cells (Fig S4B)  
203 and no loss of IFN- $\gamma$ -independent control in BMDMs doubly deficient for CD30 and IFN $\gamma$ R  
204 (*Tnfrsf8*<sup>-/-</sup>/*Ifngr*<sup>-/-</sup>) compared to *Ifngr*<sup>-/-</sup> BMDMs alone (Fig 4D). CD30 and CD30 ligand are cell-  
205 surface molecules so, together with the observation that IFN- $\gamma$ -independent control does not  
206 require cell-to-cell contact (Fig 1C, S1B), these results argue that the role of CD30 ligand on  
207 CD4 T cells during TB infection is likely immunoregulatory rather than directly bactericidal.  
208  
209 We next tested a role for the cytokine GM-CSF, which is secreted by Th1 and Th17.1 T cells  
210 (Fig 4A) and can be found in the supernatant of BMDMs co-cultured with CD4 T cells from the  
211 lungs of wild-type and *Ifng*<sup>-/-</sup> mice (Fig S4C). *Csf2ra* and *Csf2rb*, genes for the two GM-CSF  
212 receptor subunits, are expressed in BMDMs and transcription increases more than 3-fold  
213 following CD4 co-culture (Fig S4D-E). Importantly, while *Ifng*<sup>-/-</sup> CD4s control *M. tuberculosis* in  
214 wild-type BMDMs, this control is lost in BMDMs lacking the GM-CSF receptor (*Csf2rb*<sup>-/-</sup>) (Fig  
215 4E). Furthermore, wild-type but not GM-CSF deficient (*Csf2*<sup>-/-</sup>) CD4 T cells control bacterial  
216 growth during co-culture or when cultured in transwells with *Ifngr*<sup>-/-</sup> BMDMs (Fig 4F-G). Taken

217 together, these results show that lung CD4 T cells secrete GM-CSF to control *M. tuberculosis*  
218 growth in macrophages independent of IFN- $\gamma$ .

219

220 **GM-CSF activates HIF-1 $\alpha$  to restrict *M. tuberculosis* in peritoneal macrophages.** As  
221 reported, recombinant GM-CSF (rGM-CSF) is sufficient to control *M. tuberculosis* growth in  
222 peritoneal macrophages (Fig 5A) (15, 26). However, despite a clear requirement for GM-CSF  
223 signaling in BMDMs during CD4 T cell co-culture, rGM-CSF is not sufficient to induce control of  
224 *M. tuberculosis* in BMDMs (Fig 5A), regardless of the biological source of recombinant protein  
225 (Fig S5A). Moreover, rGM-CSF from multiple sources did not rescue the loss of control by *Csf2*  
226 <sup>-/-</sup> CD4 T cells in co-culture with *Ifngr*<sup>-/-</sup> BMDMs (Fig 5B, S5B). Thus, while GM-CSF is sufficient  
227 to control *M. tuberculosis* in peritoneal macrophages it is necessary but not sufficient for CD4 T  
228 cell-mediated control in BMDMs, reflecting either differences in the ability of CD4 T cell-derived  
229 and recombinant GM-CSF to effectively signal to BMDMs or secondary defects in *Csf2*<sup>-/-</sup> CD4 T  
230 cells required for IFN- $\gamma$ -independent control.

231

232 The antibacterial mechanisms downstream of GM-CSF signaling are still unclear. As expected,  
233 treatment of *M. tuberculosis*-infected peritoneal macrophages with rGM-CSF did not induce  
234 production of NO (Fig S5C). Since IFN- $\gamma$ -independent control of *M. tuberculosis* by lung CD4 T  
235 cells is NO-independent and requires HIF-1 $\alpha$  (Fig 3C), we tested a role for HIF-1 $\alpha$  in GM-CSF-  
236 mediated control in peritoneal macrophages. rGM-CSF treatment leads to an increase in the  
237 number and size of LDs which is a prominent effect of HIF-1 $\alpha$  activation (Fig 5C-E, S5D), and  
238 peritoneal macrophages lacking HIF-1 $\alpha$  have a significant defect in GM-CSF-mediated control  
239 compared to wild-type (Fig 5F). Activation of HIF-1 $\alpha$  in the absence of NO indicates that the  
240 mechanism of HIF-1 $\alpha$  activation following GM-CSF signaling is distinct from the NO-mediated  
241 HIF-1 $\alpha$  stabilization initiated by IFN- $\gamma$ .

242

243 **CD4 T cells reduces cytosolic access of *M. tuberculosis* independent of IFN- $\gamma$  and GM-**  
244 **CSF.** Autophagy is a major contributor to immune defense against *M. tuberculosis* in  
245 macrophages (27, 28). *M. tuberculosis* is targeted by autophagy following permeabilization of  
246 the phagosome by the ESX-1 secretion system, which the bacteria use to gain access to the  
247 cytosol (27-29). Early autophagic targeting of *M. tuberculosis* involves deposition of ubiquitin  
248 chains around bacteria via Parkin and the cGAS-STING pathway (30, 31). We hypothesized  
249 that CD4 T cells may control bacterial growth in an IFN- $\gamma$ -independent manner by inducing  
250 autophagy, leading to an increase in ubiquitin colocalization with intracellular bacteria. We  
251 observed, however, that treatment of infected macrophages with Th1 supernatants leads to a  
252 decrease in ubiquitin recruitment to *M. tuberculosis* in an IFN- $\gamma$ -independent manner (Fig 6A),  
253 which may be caused by reduced phagosome perforation and bacterial access to the cytosol. In  
254 support of this, treatment with Th1 supernatants also results in a significant reduction in the  
255 ability of *M. tuberculosis* to accumulate intracellular lipid inclusions, which serve as an important  
256 host-derived carbon source for the bacteria (Fig 6B) (32, 33).

257

258 To test a role for GM-CSF in this phenotype, we cultured lung-derived wild-type or *Csf2*<sup>-/-</sup> CD4 T  
259 cells in transwells over wild-type or *Ifngr*<sup>-/-</sup> BMDMs and performed microscopy for bacterial  
260 colocalization with Galectin 3 (Gal3), which forms puncta on damaged phagosomes and is a  
261 more direct measure of membrane integrity. Consistent with our findings using Th1  
262 supernatants, both wild-type and *Ifngr*<sup>-/-</sup> CD4 T cells lead to a significant reduction in Gal3-  
263 bacteria colocalization in wild-type BMDMs, demonstrating IFN- $\gamma$ -independent CD4 T cell-  
264 induced renitence of *M. tuberculosis* containing phagosomes (Fig 6C). However, this reduction  
265 did not require GM-CSF, as there was no difference between the wild-type and *Csf2rb*<sup>-/-</sup>

266 BMDMs. The connection between phagosome integrity, nutrient restriction, and IFN- $\gamma$ -  
267 independent CD4 T cell control is an ongoing area of investigation.

268 **Discussion**

269 Immunity to *M. tuberculosis* requires CD4 T cells and IFN- $\gamma$  to activate effector functions within  
270 infected macrophages. This is supported by the extreme susceptibility of *Ifng*<sup>-/-</sup> and *Rag1*<sup>-/-</sup> mice,  
271 the high co-morbidity between TB and low CD4 T cell counts caused by AIDS, and the ability of  
272 recombinant IFN- $\gamma$  to control bacterial growth in mouse and human macrophages *in vitro* (1-6,  
273 34). However, while IFN- $\gamma$  production by CD4 T cells is likely necessary for full control of  
274 infection, it has become clear that IFN- $\gamma$  is a poor biomarker for effective CD4 T cell immunity to  
275 TB and that CD4 T cells are capable of controlling infection even in the absence of IFN- $\gamma$  (1, 7,  
276 35). Here, we use an *in vitro* CD4 T cell-macrophage co-culture model to confirm the finding that  
277 CD4 T cells can control *M. tuberculosis* in the absence of IFN- $\gamma$ , and we demonstrate that this  
278 control is mediated by a secreted, antibacterial effector produced by lung-derived CD4 T cells  
279 and by *in vitro* differentiated Th1 and Th17.1 T cells.

280  
281 RNA sequencing of *M. tuberculosis*-infected BMDMs after CD4 T cell co-culture revealed an  
282 IFN- $\gamma$ -independent program of HIF-1 $\alpha$ -driven transcription and significant upregulation of genes  
283 involved in glycolysis, reminiscent of the effects observed following IFN- $\gamma$  activation. CD4 T cells  
284 also induced the development of macrophage LDs—a direct effect of HIF-1 $\alpha$  stabilization—in  
285 the absence of IFN- $\gamma$  signaling. LDs support macrophage defense against infection, and lung  
286 granulomas in TB patients are surrounded by “foamy macrophages” that contain large  
287 accumulations of LDs (36, 37). Importantly, we demonstrate that HIF-1 $\alpha$  expression is required  
288 for IFN- $\gamma$ -independent control and show that, unlike HIF-1 $\alpha$  stabilization following IFN- $\gamma$   
289 signaling, CD4 T cells stabilize HIF-1 $\alpha$  in *Ifngr*<sup>-/-</sup> macrophages in the absence of NO. These  
290 findings help clarify the role of NO during *M. tuberculosis* infection. While NO has long been  
291 thought to be directly bactericidal to *M. tuberculosis*, the regulatory role of NO as a second  
292 messenger has gained recent appreciation (38, 39), including work from our laboratory showing

293 that HIF-1 $\alpha$  and iNOS form a positive feedback loop required for IFN- $\gamma$ -mediated control of *M.*  
294 *tuberculosis* in BMDMs (23). Furthermore, we have shown that HIF-1 $\alpha$  and iNOS participate in  
295 the same pathway following IFN- $\gamma$  activation of BMDMs (23). IFN- $\gamma$ - and NO-independent HIF-  
296 1 $\alpha$  stabilization during CD4 T cell co-culture positions NO upstream of HIF-1 $\alpha$  following IFN- $\gamma$   
297 signaling and implicates NO as primarily a regulatory, rather than bactericidal, molecule during  
298 *M. tuberculosis* infection, at least in the context of CD4 T cell activation of macrophages.  
299 Furthermore, the need for HIF-1 $\alpha$  expression to mediate both IFN- $\gamma$ -mediated and IFN- $\gamma$ -  
300 independent CD4 T cell control emphasizes the central role of HIF-1 $\alpha$  in cell-intrinsic control of  
301 infection and indicates that these two pathways of macrophage activation converge on HIF-1 $\alpha$   
302 activation. Finally, we show that GM-CSF control of *M. tuberculosis* in peritoneal macrophages  
303 requires HIF-1 $\alpha$ . This is the first demonstration of a functional link between GM-CSF and HIF-1 $\alpha$   
304 during *M. tuberculosis* infection, although this relationship has precedence in the literature in  
305 other contexts. In mouse neural progenitor cells GM-CSF treatment induces a PI3K–NF- $\kappa$ B  
306 signaling pathway that increases HIF-1 $\alpha$  expression (40), and in a mouse melanoma model GM-  
307 CSF treatment induces macrophage secretion of vascular endothelial growth factor (VEGF) in a  
308 HIF-1 $\alpha$ -dependent manner (41). Research into the signaling pathways that mediate NO-  
309 dependent and -independent HIF-1 $\alpha$  stabilization will help elucidate mechanisms of cell-intrinsic  
310 control of *M. tuberculosis*.

311  
312 Given the importance of autophagy for macrophage control of *M. tuberculosis*, we reasoned that  
313 increased autophagic targeting may contribute to IFN- $\gamma$ -independent control by CD4 T cells.  
314 Instead, we observed a decrease in ubiquitin recruitment to *M. tuberculosis*-containing  
315 phagosomes, a decrease in lipid uptake by the bacteria, and a decrease in phagosome damage  
316 as measured by Gal3 puncta colocalization that was independent of both IFN- $\gamma$  and GM-CSF.  
317 IFN- $\gamma$  and LPS stimulation can induce resistance to phagosome membrane damage in

318 macrophages that is important for host resistance to another intracellular pathogen, *Listeria*  
319 *monocytogenes* (42-44). Additionally, IFN- $\gamma$  stimulation has been shown to help maintain  
320 phagosome integrity during *M. tuberculosis* infection in a Rab20-dependent manner (45). Our  
321 results indicate that CD4 T cells secrete an IFN- $\gamma$ - and GM-CSF-independent effector that  
322 reinforces the integrity of *M. tuberculosis* containing phagosomes and may contribute to host  
323 control of infection.

324

325 The ligand-receptor pair CD30 ligand (*Tnfsf8*), also known as CD153, and CD30 (*Tnfrsf8*) has  
326 generated excitement as a potentially important IFN- $\gamma$ -independent signaling pathway during *M.*  
327 *tuberculosis* infection. In humans, higher frequencies of *M. tuberculosis* specific CD153+ CD4 T  
328 cells correlate with a lower lung bacterial load (46), and *Tnfsf8*<sup>-/-</sup> mice have earlier mortality than  
329 wild-type following infection (25). However, data point to a regulatory, rather than bactericidal,  
330 role for CD153, particularly in the lung. *Tnfsf8* expression is mostly dispensable for control of  
331 infection outside of the lungs, and the overabundance of IFN- $\gamma$ -producing CD4 T cells observed  
332 in the lungs of *Tnfsf8*<sup>-/-</sup> mice following infection has been shown to drive immunopathology (13,  
333 46). In a similar manner, reconstitution of *Rag1*<sup>-/-</sup> mice with CD4 T cells that overexpress IFN- $\gamma$   
334 induces pulmonary pathology and exacerbates bacterial burden in the lung while controlling  
335 infection outside of the lungs (13). *Rag1*<sup>-/-</sup> mice reconstituted with *Tnfsf8*<sup>-/-</sup> CD4 T cells have  
336 decreased survival compared to wild-type, but lowering the frequency of IFN- $\gamma$ -producing CD4 T  
337 cells in the lung by reconstitution with a 1:1 ratio of *Tnfsf8*<sup>-/-</sup> and *Ifng*<sup>-/-</sup> CD4 T cells rescues this  
338 phenotype (25). We show that BMDMs have low expression of *Tnfrsf8* at baseline and after  
339 CD4 T cell co-culture, and that BMDMs deficient in *Ifngr* and *Tnfrsf8* have no loss of CD4 T cell-  
340 mediated control compared to macrophages lacking *Ifngr* alone. Collectively, these data point to  
341 a model where CD153 negatively regulates CD4 T cell IFN- $\gamma$  production to control immune



342 pathology, particularly in the lung, rather than signaling through CD30 on infected macrophages  
343 to induce cell-intrinsic control of bacterial replication.

344

345 Mouse and human T cells make GM-CSF during *M. tuberculosis* infection (15), and *Csf2*<sup>-/-</sup> mice  
346 have a higher lung bacterial burden and succumb more quickly to disease than wild-type (16).

347 Chimeric mouse experiments with *Csf2*<sup>-/-</sup> and wild-type mice show the GM-CSF production is  
348 particularly important for control of infection in the lung, with no effect in the spleen (15).

349 Furthermore, adoptive transfer of wild-type or *Csf2*<sup>-/-</sup> CD4 T cells into wild-type or *Csf2*<sup>-/-</sup> mice  
350 shows that CD4 T cell-derived GM-CSF is important *in vivo* only in the absence of non-

351 hematopoietic GM-CSF (15). These *in vivo* experiments are insufficient to conclude that CD4 T  
352 cell-derived GM-CSF acts directly on infected macrophages and are complicated by the

353 immunoregulatory roles of GM-CSF, including the fact that *Csf2*<sup>-/-</sup> mice and humans with

354 deficiencies in GM-CSF Receptor signaling have a defect in alveolar macrophage development  
355 (47, 48). Our finding that GM-CSF is required for CD4 T cell-mediated IFN- $\gamma$ -independent

356 control is the first evidence that CD4 T cell-derived GM-CSF participates in cell-intrinsic control  
357 of *M. tuberculosis*.

358

359 While rGM-CSF is sufficient to restrict *M. tuberculosis* in peritoneal macrophages, it is

360 necessary but not sufficient for control in BMDMs and, surprisingly, does not rescue the lack of  
361 IFN- $\gamma$ -independent control seen in co-cultures with *Csf2*<sup>-/-</sup> CD4 T cells. One explanation for this

362 discrepancy may be that *Csf2*<sup>-/-</sup> CD4 T cells lack an additional effector produced by wild-type T  
363 cells that is required for GM-CSF-mediated control in BMDMs. This hypothesis is supported by

364 literature showing that GM-CSF is important for the development, activation, and function of

365 CD4 T cells (49). *Csf2*<sup>-/-</sup> mice have a diminished Th1 response compared to wild-type (50),

366 which partially accounts for the increased susceptibility of *Csf2*<sup>-/-</sup> mice to *M. tuberculosis*

367 infection (16). In anti-tumor immunity, GM-CSF treatment increases the frequency of tumor-  
368 specific Th1 T cells (51), and, in experimental autoimmune thyroiditis, GM-CSF treatment has  
369 been shown to both enhance IL-6–dependent Th17 cell responses and increase the number of  
370 immunoregulatory CD4+CD25+ T cells (52, 53). Alternatively, there may be differences in the  
371 ability of CD4 T cell-derived and recombinant GM-CSF to effectively signal to BMDMs. *In vivo*,  
372 GM-CSF is subject to substantial post-translation modifications—primarily N- and O-  
373 glycosylation—with a molecular weight ranging from 14 to 32 kDa (54), and glycosylation of  
374 GM-CSF is required for effective signaling and superoxide induction in neutrophils (55). Western  
375 blot analysis of the supernatant of *in vitro* differentiated Th1s revealed at least seven distinct  
376 species of GM-CSF, including a heavily glycosylated 32 kDa variant, compared to the single 14  
377 kDa band for non-glycosylated recombinant GM-CSF (Fig S5E). Furthermore, the finding that  
378 HIF-1 $\alpha$  is required for control in BMDMs by *Ifng*<sup>-/-</sup> CD4 T cells and for control in peritoneal  
379 macrophages by rGM-CSF suggests similar mechanisms of action and argues that GM-CSF,  
380 rather than a second signal, from *Ifng*<sup>-/-</sup> CD4 T cells is the critical factor for IFN- $\gamma$ -independent  
381 control. Further studies that delineate the role of GM-CSF in CD4 T cell development and  
382 macrophage activation will aid the development of vaccines capable of eliciting *M. tuberculosis*-  
383 specific GM-CSF-producing CD4 T cells and may expediate an end to the global TB pandemic.

384 **Methods**

385 **Ethics statement**

386 All procedures involving the use of mice were approved by the University of California, Berkeley  
387 Institutional Animal Care and Use Committee (protocol R353-1113B). All protocols conform to  
388 federal regulations and the National Research Council's *Guide for the Care and Use of*  
389 *Laboratory Animals*.

390

391 **Reagents**

392 Recombinant mouse IFN- $\gamma$  was obtained from R&D Systems (485-MI) and used at 6.25 ng/mL.  
393 Recombinant mouse GM-CSF expressed in HEK293 cells was obtained from Sino Biological  
394 (51048-MNAH) and used at 10 ng/mL. Proteinase K was obtained from Millipore Sigma  
395 (RPROTK-RO); 20 mg/mL stocks in ddH<sub>2</sub>O were diluted to a working concentration of 200  
396  $\mu$ g/mL in cell culture supernatant. 2-Deoxy-D-glucose (2-DG) was obtained from Sigma Aldrich  
397 (D8375) and used at 0.32 mM. Supernatant nitrite was measured by the Griess test as a proxy  
398 for NO production by mixing a solution of .1% naphthylethylenediamine, 1% sulfanilamide, and  
399 2% phosphoric acid 1:1 with supernatant and measuring absorbance at 546nm.

400

401 **Mice**

402 C57BL/6 (wild-type, strain 000664), B6.129S7-*Ifng*<sup>tm1Ts</sup>/J (*Ifng*<sup>-/-</sup>, strain 002287), B6.129P2-  
403 *Nos2*<sup>tm1Lau</sup>/J (*Nos2*<sup>-/-</sup>, strain 002609), and B6.129S-*Csf2*<sup>tm1Mlg</sup>/J (*Csf2*<sup>-/-</sup>, strain 026812) were  
404 purchased from The Jackson Laboratory and bred in-house. B6.129-*Hif1a*<sup>tm3Rsjc</sup>/J (*Hif1a*<sup>fl/fl</sup>,  
405 strain 007561) and B6.129P2-*Lyz2*<sup>tm1(cre)lfo</sup>/J (LysMcre, strain 004781) mice were obtained from  
406 The Jackson Laboratory, crossed to generate *Hif1a*<sup>fl/fl</sup>, LysMcre<sup>+/+</sup> (referred to here as *Hif1a*<sup>-/-</sup>)  
407 mice and bred in-house. *Ifngr1*<sup>-/-</sup> (*Ifngr*<sup>-/-</sup>) mice were provided by D. Raulet. *Tnfrsf1a*<sup>-/-</sup>/*Tnfrsf1b*<sup>-/-</sup>  
408 (*Tnfr1/2*<sup>-/-</sup>) mice were provided by G. Barton (56). *Ifnar*<sup>-/-</sup>/*Ifngr1*<sup>-/-</sup> (*Ifnar*<sup>-/-</sup>/*Ifngr*<sup>-/-</sup>) mice were  
409 provided by M. Welch (57). *Csf2rb*<sup>-/-</sup> mice were provided by S. Shin (58). C7 TCR tg.CD90.1

410 (C7 Tg) mice, which express a T cell receptor specific for the *M. tuberculosis* antigen ESAT-6,  
411 were provided by K. Urdahl and have been described previously (59, 60). H11<sup>Cas9</sup>  
412 CRISPR/Cas9 knock-in (Cas9 Tg) mice, which constitutively express CRISPR associated  
413 protein 9 (Cas9), were provided by R. Vance and were crossed to *Ifngr*<sup>-/-</sup> mice to generate *Ifngr*<sup>-/-</sup>  
414  $\Delta$ Cas9 Tg mice.

415

#### 416 **Cell culture**

417 Bone-marrow was obtained from wild-type, *Nos2*<sup>-/-</sup>, *Hif1a*<sup>-/-</sup>, *Ifngr*<sup>-/-</sup>, *Tnfr1/2*<sup>-/-</sup>, *Ifnar*<sup>-/-</sup>/*Ifngr*<sup>-/-</sup>, and  
418 *Csf2rb*<sup>-/-</sup> mice and cultured in DMEM with 10% FBS, 2 mM L-glutamine, and 10% supernatant  
419 from 3T3–M-CSF cells (BMDM media) for 6 d with feeding on day 3 to generate bone marrow-  
420 derived macrophages (BMDMs). Peritoneal macrophages were obtained from wild-type and  
421 *Hif1a*<sup>-/-</sup> mice by 5 mL ice-cold PBS lavage and cultured in RPMI with 10% FBS, 2 mM L-  
422 glutamine and 35  $\mu$ g/mL kanamycin (peritoneal macrophage media) for 24 h to allow for  
423 macrophage adherence.

424

#### 425 **CRISPR/Cas9 gene targeting**

426 Guide sequences targeting *Tnfrsf8* were selected from the murine Brie guide library and cloned  
427 into the pLentiGuidePuro backbone from Addgene (52963). Bone marrow was obtained from  
428 *Ifngr*<sup>-/-</sup> $\Delta$ Cas9 Tg mice, treated with ACK lysis buffer, and cultured in BMDM media. Lenti-X 293T  
429 cells from Takara Bio (632180) were co-transfected with psPAX2, pMD2.G, and  
430 pLentiGuidePuro containing target guide sequences using Lipofectamine 2000 from Invitrogen  
431 (11668019) according to the manufacturer's protocol. The next day, 293T media was replaced  
432 with BMDM media for 24 hours to collect lentivirus, and *Ifngr*<sup>-/-</sup> $\Delta$ Cas9 Tg BMDMs were then  
433 transduced using 293T supernatant. On day 5, 4  $\mu$ g/mL puromycin was added to select for a  
434 polyclonal population of cells. On day 12, *Ifngr*<sup>-/-</sup>/*Tnfrsf8*<sup>-/-</sup> double-knockout BMDMs were  
435 harvested and infected with *M. tuberculosis* as described above. Targeting efficiency was

436 determined by sequencing targeted genomic sites and analyzing population level genome  
437 editing using TIDE analysis (<https://tide.deskgen.com/>) (61). *Tnfrsf8* was targeted in two  
438 independent experiments, each with three targeting guides. Data shown in Fig 4 are  
439 representative of results with gRNA 5'-AGACCTCAGCCACTACCCAG-3' which had genome  
440 editing efficacy of 91.3–91.9%.

441

#### 442 **Bacterial cultures**

443 Frozen stocks of low passage *M. tuberculosis* Erdman were grown to log phase over 5 d at  
444 37°C in Middlebrook 7H9 media with 10% albumin-dextrose-saline, 0.5% glycerol, and 0.05%  
445 Tween-80.  $\Delta EccC$  *M. tuberculosis* Erdman and *M. tuberculosis* Erdman-lux strain expressing  
446 luciferase from the *luxCDABE* operon have been described previously and were cultured as  
447 described above (62, 63). *M. tuberculosis* Erdman-mCherry was generated by D. Kotov and R.  
448 Vance by transforming wild-type Erdman with pMSP12::mCherry, a gift from Lalita  
449 Ramakrishnan (Addgene plasmid # 30169; <http://n2t.net/addgene:30169>;  
450 RRID:Addgene\_30169) and was cultured as described above.

451

#### 452 ***In vitro* infections**

453 BMDMs were plated in 24-well or 96-well plates at  $3 \times 10^5$  or  $5 \times 10^4$  cells/well, respectively,  
454 allowed to adhere for 48 hours, and infected in DMEM with 5% horse serum and 5% FBS by 4-  
455 hour phagocytosis or 10 min spinfection at 300 rcf. Unless otherwise indicated, BMDMs were  
456 infected at a multiplicity of infection of 1. Peritoneal macrophages were plated in 12-well, 24-well  
457 or 96-well plates at  $1.65 \times 10^6$ ,  $1.1 \times 10^6$  or  $1.5 \times 10^5$  cells/well, respectively, cultured for 24  
458 hours to allow for macrophage adherence, washed with PBS, and infected in peritoneal  
459 macrophage media with 5% horse serum by 10 min spinfection at 300 rcf. After infection, cells  
460 were washed once with PBS before replacing with the appropriate media. CFU/well was  
461 determined at the indicated time points by washing infected cells with PBS, lysing in sterile-

462 filtered distilled water with 0.5% Triton-X100 for 10 min at 37°C, diluting in PBS prepared with  
463 0.05% Tween 80, plating onto 7H10 plates supplemented with 0.5% glycerol and 10% OADC  
464 (Middlebrook), and incubating for 21 d at 37°C. CFU is reported as fold-change over inoculum  
465 (calculated by plating t=0 CFU immediately after phagocytosis or sp infection), or as CFU/well,  
466 referring to the total number of bacteria per well of the assay plate. Luminescence emission of  
467 *M. tuberculosis* Erdman-lux was measured at 470 nm with a Spectra-L plate reader (Molecular  
468 Devices, San Jose, CA).

469

#### 470 **Lung-derived CD4 T cell co-cultures**

471 CD4<sup>+</sup> cells were isolated from the lungs of 7–12-week-old wild-type, *Ifng*<sup>-/-</sup>, *Nos2*<sup>-/-</sup> or *Csf2*<sup>-/-</sup>  
472 mice 21 – 28 d after ~500 CFU aerosol infection with *M. tuberculosis* Erdman using mouse CD4  
473 (L3T4) MicroBeads from Miltenyi Biotec (130-117-043) according to the manufacturer's protocol,  
474 resuspended in RPMI with 10% FBS, 2 mM L-glutamine, 1 mM Sodium pyruvate, 1 mM NEAA,  
475 20 mM HEPES, 55 µM 2-mercaptoethanol and 35 µg/mL kanamycin (T cell media)  
476 supplemented with 10% supernatant from 3T3–M-CSF cells and added to infected BMDMs in  
477 co-culture or in transwells. Unless indicated, CD4 T cells were added at a 5:1 T cell:BMDM  
478 ratio. In these experiments, T cell media supplemented with 10% supernatant from 3T3–M-CSF  
479 cells was used for untreated and IFN-γ-treated controls.

480

#### 481 ***In vitro* T cell differentiation**

482 CD4<sup>+</sup> cells were isolated from C7 Tg mouse spleens using mouse CD4 (L3T4) MicroBeads  
483 from Miltenyi Biotec (130-117-043) according to the manufacturer's protocol and cultured in T  
484 cell media at 2 x 10<sup>6</sup> cells/mL with 1 µM ESAT-6 peptide pool (NIH BEI Resources Repository  
485 catalog no. NR-34824) and 2 x 10<sup>6</sup> cells/mL irradiated wild-type splenocytes (3200 rads). To  
486 differentiate Th1s, 10 U/mL IL-2 from R&D Systems (1150-ML), 5 U/mL IL-12 p70 from  
487 PeproTech (210-12), and 1 µg/mL rat anti-mouse IL-4 from R&D Systems (MAB404100) was

488 added; for Th17.1s, 2 ng/mL TGF- $\beta$  from Invitrogen (14834262), 20 ng/mL IL-6 from PeproTech  
489 (216-16), 2.5  $\mu$ g/mL rat anti-mouse IFN- $\gamma$  from Biolegend (505801) and 1  $\mu$ g/mL anti-IL-4 was  
490 added; and for Th2s, 10 U/mL IL-2, 10 ng/mL IL-4 from R&D Systems (404-ML), and 3  $\mu$ g/mL  
491 anti-IFN- $\gamma$  was added. On day 3, cells were collected and replated at  $2 \times 10^6$  cells/mL with 10  
492 U/mL IL-2 (Th1s), 2 ng/mL TGF- $\beta$ , 10 ng/mL IL-6, 30 ng/mL IL-1 $\beta$  from R&D Systems (401-ML),  
493 0.5  $\mu$ g/mL anti-IFN- $\gamma$ , and 0.33  $\mu$ g/mL anti-IL-4 (Th17.1s), or 10 U/mL IL-2, 10 ng/mL IL-4, and 1  
494  $\mu$ g/mL anti-IFN- $\gamma$  (Th2s). Differentiated T cells were harvested on day 5 and used in co-culture  
495 at a 5:1 T cell:BMDM ratio or were replated at  $2 \times 10^6$  cells/mL in T cell media and stimulated  
496 overnight with 100 U/mL IL-2 (Th1s), 5 ng/mL IL-1 $\beta$  and 5 ng/mL IL-23 from Invitrogen  
497 (14823163) (Th17.1s) or 100 U/mL IL-2 and 100 ng/mL IL-4 (Th2s) in plates coated with 10  
498  $\mu$ g/mL Armenian hamster anti-mouse CD3 $\epsilon$  (BE0001-1) and 2  $\mu$ g/mL Syrian hamster anti-  
499 mouse CD28 (BE0015-1) from Bio X Cell to generate Th1, Th17.1, or Th2 supernatants. On day  
500 6, T cell supernatants were collected and supplemented with 10% supernatant from 3T3-M-  
501 CSF cells before addition to BMDMs. In these experiments, T cell media supplemented with  
502 10% supernatant from 3T3-M-CSF cells was used for untreated and IFN- $\gamma$ -treated controls.

503

#### 504 **Cytokine profiling**

505 Differentiated Th1 and Th17.1 cells were harvested on day 5, replated at  $2 \times 10^6$  cells/mL in  
506 Opti-MEM media (Gibco) plus 2 mM L-glutamine, 1 mM Sodium pyruvate, 1 mM NEAA, 20 mM  
507 HEPES and 55  $\mu$ M 2-mercaptoethanol (Opti-MEM T cell media) and stimulated overnight as  
508 described above. On day 6, T cell supernatants were collected, and cytokine profiling was  
509 performed by the Stanford Human Immune Monitoring Center (Stanford, CA) using a mouse 48-  
510 plex immunoassay (Procarta).

511

#### 512 **RNA sequencing**

513 For RNA-seq on BMDMs after lung CD4 T cell co-culture (Fig 2), four independent experiments  
514 were performed. For each experiment, BMDMs were seeded in 24-well plates, infected as  
515 described, and co-cultured with lung CD4 T cells isolated as described. At 24 hours  
516 postinfection, CD4 T cells were separated from BMDMs using CD4 (L3T4) Dynabeads from  
517 Invitrogen (11445D) according to the manufacturer's protocol, and BMDMs were lysed in 1 mL  
518 TRIzol (Invitrogen). Total RNA was extracted using chloroform and 2 mL Heavy Phase Lock Gel  
519 tubes from QuantaBio (2302830), and the aqueous layer was further purified using RNeasy Mini  
520 spin columns from Qiagen (74104). RNA quality was determined using an Agilent 2100  
521 Bioanalyzer and RNA concentration was determined using the Qubit Quantitation Platform at  
522 the Functional Genomics Laboratory of The California Institute for Quantitative Biosciences  
523 (University of California, Berkeley). RNA-seq libraries were prepared by the DNA Technologies  
524 and Expression Analysis Core (University of California, Davis) and differential gene expression  
525 was analyzed by the Genome Center and Bioinformatics Core Facility (University of California,  
526 Davis).

527

#### 528 **HIF-1 $\alpha$ western blot**

529 BMDMs infected for 12 hours at a multiplicity of infection of 5 as described were washed with  
530 ice cold PBS, lysed in 1X SDS-PAGE buffer on ice and heat sterilized for 20 min at 100°C for  
531 removal from the BSL3 facility. Total protein lysate was analyzed by SDS-PAGE using precast  
532 4-20% Criterion TGX protein gels from Bio-Rad Laboratories (5671093), rabbit mAb to HIF-1 $\alpha$   
533 (D2U3T) from Cell Signaling Technology (14179S), and an HRP-conjugated secondary  
534 antibody. Blots were developed with Western Lightning Plus-ECL chemiluminescence substrate  
535 from PerkinElmer (NEL105001EA) and a ChemiDoc MP system from Bio-Rad Laboratories.

536

#### 537 **Microscopy**



538 For immunofluorescence microscopy, BMDMs were plated at  $3 \times 10^4$  cells/well in black, clear  
539 bottom 96-well plates and infected with *M. tuberculosis* Erdman-mCherry as described above at  
540 a multiplicity of infection of 2. Eight hours postinfection, cells were fixed in 4%  
541 paraformaldehyde, washed with PBS and immunostained for polyubiquitin (FK2, Millipore Sigma  
542 04-263, 1:400 dilution) or Galectin-3 (B2C10, sc-32790, 1:50 dilution) at 4C overnight, followed  
543 by secondary antibody staining at room temperature for 30 minutes. For microscopy to detect  
544 lipid droplets and intracellular lipid inclusions, BMDMs or peritoneal macrophages were plated at  
545  $5 \times 10^4$  or  $1.5 \times 10^5$  cells/well, respectively, in black, clear bottom 96-well plates and infected  
546 with *M. tuberculosis* Erdman-mCherry as described above at a multiplicity of infection of 4  
547 (BMDMs) or 2 (peritoneal macrophages). At the indicated time points, cells were fixed in 4%  
548 paraformaldehyde, washed with PBS and stained for neutral lipids with BODIPY 493/503 from  
549 Invitrogen (D3922) at 1  $\mu\text{g}/\text{mL}$  and with DAPI. All imaging was done on a Perkin Elmer Opera  
550 Phenix Automated Microscopy System.

551

552 **Statistical Analysis.** Analysis of statistical significance was performed using GraphPad Prism 8  
553 (GraphPad, La Jolla, CA).

554 **Acknowledgements**

555 *Csf2rb*<sup>-/-</sup>, *Ifngr*<sup>-/-</sup>, *Ifngr*<sup>-/-</sup>/*Ifnar*<sup>-/-</sup>, *Nos2*<sup>-/-</sup>, *Tnfrsf1a*<sup>-/-</sup>/*Tnfrsf1b*<sup>-/-</sup>, C7 Tg, and Cas9 Tg mice were a gift  
556 from S. Shin, D. Raulet, M. Welch, R. Vance, G. Barton, K. Urdahl and R. Vance, respectively.  
557 We thank T. Burke, D. Kotov, K. Lien, K. Magee, S. Margolis, X. Nguyenla, C. Nicolai, A. Olive,  
558 A. Roberts, and L. Shallow for technical assistance. We thank Y. Rosenberg-Hasson and the  
559 Human Immune Monitoring Center (Stanford University) for cytokine profiling, the Functional  
560 Genomics Laboratory (UC Berkeley) for RNA sample quality check, and L. Froenicke at the  
561 DNA Technologies and Expression Analysis Core (UC Davis) and at the Genome Center and  
562 Bioinformatics Core Facility (UC Davis) for RNAseq and data analysis. Finally, we thank G.  
563 Barton, M. DuPage, R. Vance and members of the Cox and Stanley labs for helpful discussions.  
564 This work was supported by NSF Graduate Research Fellowship DGE-1752814 to E.V.D. and  
565 funding from the National Institute of Allergy and Infectious Diseases (1R01AI143722 to S.A.S  
566 and P01 AI063302 and U19 AI106754 to J.S.C. and S.A.S).

567

568 **Author Contributions**

569 Conceptualization, Methodology, and Analysis: EVD and SAS

570 Investigation: EVD, HMM, DMF, JPB, LHM, and SR

571 Writing – original draft: EVD

572 Writing – review & editing: EVD, HMM, DMF, JSC and SAS

573 Funding Acquisition: EVD, JSC and SAS

574 Supervision: JSC and SAS

575

576 **Disclosures**

577 The authors declare no competing interests.

578

579 **References**

- 580 1. Green AM, Difazio R, Flynn JL. IFN- $\gamma$  from CD4 T cells is essential for host survival  
581 and enhances CD8 T cell function during Mycobacterium tuberculosis infection. *Journal of*  
582 *Immunology*. 2013;190(1):270-7.
- 583 2. Amelio P, Portevin D, Hella J, Reither K, Kamwela L, Lweno O, et al. HIV Infection  
584 Functionally Impairs Mycobacterium tuberculosis-Specific CD4 and CD8 T-Cell Responses.  
585 *Journal of virology*. 2019;93(5).
- 586 3. Flesch IE, Kaufmann SH. Mycobacterial growth inhibition by interferon-gamma-  
587 activated bone marrow macrophages and differential susceptibility among strains of  
588 Mycobacterium tuberculosis. *Journal of immunology (Baltimore, Md : 1950)*. 1987;138(12).
- 589 4. Flesch IE, Kaufmann SH. Mechanisms involved in mycobacterial growth inhibition by  
590 gamma interferon-activated bone marrow macrophages: role of reactive nitrogen intermediates.  
591 *Infection and Immunity*. 1991;59(9):3213-8.
- 592 5. Flynn JL, Chan J, Triebold KJ, Dalton DK, Stewart TA, Bloom BR. An essential role for  
593 interferon gamma in resistance to Mycobacterium tuberculosis infection. *The Journal of*  
594 *Experimental Medicine*. 1993;178(6):2249-54.
- 595 6. Cooper AM, Dalton DK, Stewart TA, Griffin JP, Russell DG, Orme IM. Disseminated  
596 tuberculosis in interferon gamma gene-disrupted mice. *The Journal of Experimental Medicine*.  
597 1993;178(6):2243-7.
- 598 7. Nunes-Alves C, Booty MG, Carpenter SM, Jayaraman P, Rothchild AC, Behar SM. In  
599 search of a new paradigm for protective immunity to TB. *Nature Reviews Microbiology*.  
600 2014;12(4):289-99.
- 601 8. Ahmed A, Rakshit S, Adiga V, Dias M, Dwarkanath P, D'Souza G, et al. A century of  
602 BCG: Impact on tuberculosis control and beyond. *Immunological reviews*. 2021;301(1).
- 603 9. Tameris M, Hatherill M, Landry B, Scriba T, Snowden M, Lockhart S, et al. Safety and  
604 efficacy of MVA85A, a new tuberculosis vaccine, in infants previously vaccinated with BCG: a  
605 randomised, placebo-controlled phase 2b trial. *Lancet (London, England)*. 2013;381(9871).
- 606 10. Kaufmann SHE. Tuberculosis vaccine development at a divide. *Current Opinion in*  
607 *Pulmonary Medicine*. 2014;20(3):294-300.
- 608 11. Bustamante J, Boisson-Dupuis S, Abel L, Casanova J-L. Mendelian susceptibility to  
609 mycobacterial disease: genetic, immunological, and clinical features of inborn errors of IFN- $\gamma$   
610 immunity. *Seminars in Immunology*. 2014;26(6):454-70.
- 611 12. Gallegos AM, van Heijst JWJ, Samstein M, Su X, Pamer EG, Glickman MS. A gamma  
612 interferon independent mechanism of CD4 T cell mediated control of M. tuberculosis infection  
613 in vivo. *PLoS Pathogens*. 2011;7(5):e1002052.

- 614 13. Sakai S, Kauffman KD, Sallin MA, Sharpe AH, Young HA, Ganusov VV, et al. CD4 T  
615 Cell-Derived IFN- $\gamma$  Plays a Minimal Role in Control of Pulmonary Mycobacterium tuberculosis  
616 Infection and Must Be Actively Repressed by PD-1 to Prevent Lethal Disease. *PLoS Pathogens*.  
617 2016;12(5):e1005667.
- 618 14. Bryson BD, Rosebrock TR, Tafesse FG, Itoh CY, Nibasumba A, Babunovic GH, et al.  
619 Heterogeneous GM-CSF signaling in macrophages is associated with control of Mycobacterium  
620 tuberculosis. *Nature Communications*. 2019;10(1):2329.
- 621 15. Rothchild AC, Stowell B, Goyal G, Nunes-Alves C, Yang Q, Papavinasasundaram K, et  
622 al. Role of Granulocyte-Macrophage Colony-Stimulating Factor Production by T Cells during  
623 Mycobacterium tuberculosis Infection. *mBio*. 2017;8(5).
- 624 16. Gonzalez-Juarrero M, Hattle JM, Izzo A, Junqueira-Kipnis AP, Shim TS, Trapnell BC, et  
625 al. Disruption of granulocyte macrophage-colony stimulating factor production in the lungs  
626 severely affects the ability of mice to control Mycobacterium tuberculosis infection. *Journal of*  
627 *Leukocyte Biology*. 2005;77(6):914-22.
- 628 17. Chroneos ZC, Midde K, Sever-Chroneos Z, Jagannath C. Pulmonary surfactant and  
629 tuberculosis. *Tuberculosis*. 2009;89:S10-S4.
- 630 18. Trapnell B, Carey B, Uchida K, Suzuki T. Pulmonary alveolar proteinosis, a primary  
631 immunodeficiency of impaired GM-CSF stimulation of macrophages. *Current opinion in*  
632 *immunology*. 2009;21(5).
- 633 19. Chen ZW. Multifunctional immune responses of HMBPP-specific V $\gamma$ 2V $\delta$ 2 T cells in M.  
634 tuberculosis and other infections. *Cellular & Molecular Immunology*. 2013;10(1):58-64.
- 635 20. Kuleshov M, Jones M, Rouillard A, Fernandez N, Duan Q, Wang Z, et al. Enrichr: a  
636 comprehensive gene set enrichment analysis web server 2016 update. *Nucleic acids research*.  
637 2016;44(W1).
- 638 21. Xie Z, Bailey A, Kuleshov M, Clarke D, Evangelista J, Jenkins S, et al. Gene Set  
639 Knowledge Discovery with Enrichr. *Current protocols*. 2021;1(3).
- 640 22. Braverman J, Sogi KM, Benjamin D, Nomura DK, Stanley SA. HIF-1 $\alpha$  Is an Essential  
641 Mediator of IFN- $\gamma$ -Dependent Immunity to Mycobacterium tuberculosis. *Journal of*  
642 *Immunology*. 2016;197(4):1287-97.
- 643 23. Braverman J, Stanley SA. Nitric Oxide Modulates Macrophage Responses to  
644 Mycobacterium tuberculosis Infection through Activation of HIF-1 $\alpha$  and Repression of NF- $\kappa$ B.  
645 *Journal of Immunology*. 2017;199(5):1805-16.
- 646 24. Knight M, Braverman J, Asfaha K, Gronert K, Stanley S. Lipid droplet formation in  
647 Mycobacterium tuberculosis infected macrophages requires IFN- $\gamma$ /HIF-1 $\alpha$  signaling and  
648 supports host defense. *PLoS pathogens*. 2018;14(1).

- 649 25. Sallin MA, Kauffman KD, Riou C, Du Bruyn E, Foreman TW, Sakai S, et al. Host  
650 resistance to pulmonary Mycobacterium tuberculosis infection requires CD153 expression.  
651 Nature Microbiology. 2018;3(11):1198-205.
- 652 26. Rothchild AC, Jayaraman P, Nunes-Alves C, Behar SM. iNKT cell production of GM-  
653 CSF controls Mycobacterium tuberculosis. PLoS Pathogens. 2014;10(1):e1003805.
- 654 27. Watson RO, Manzanillo PS, Cox JS. Extracellular M. tuberculosis DNA targets bacteria  
655 for autophagy by activating the host DNA-sensing pathway. Cell. 2012;150(4):803-15.
- 656 28. Watson RO, Bell SL, MacDuff DA, Kimmey JM, Diner EJ, Olivas J, et al. The Cytosolic  
657 Sensor cGAS Detects Mycobacterium tuberculosis DNA to Induce Type I Interferons and  
658 Activate Autophagy. Cell Host & Microbe. 2015;17(6):811-9.
- 659 29. Stanley SA, Raghavan S, Hwang WW, Cox JS. Acute infection and macrophage  
660 subversion by Mycobacterium tuberculosis require a specialized secretion system. Proceedings  
661 of the National Academy of Sciences of the United States of America. 2003;100(22):13001-6.
- 662 30. Manzanillo PS, Ayres JS, Watson RO, Collins AC, Souza G, Rae CS, et al. The ubiquitin  
663 ligase parkin mediates resistance to intracellular pathogens. Nature. 2013;501(7468):512-6.
- 664 31. Budzik JM, Swaney DL, Jimenez-Morales D, Johnson JR, Garelis NE, Repasy T, et al.  
665 Dynamic post-translational modification profiling of Mycobacterium tuberculosis-infected  
666 primary macrophages. eLife. 2020;9.
- 667 32. Lovewell RR, Sasseti CM, VanderVen BC. Chewing the fat: lipid metabolism and  
668 homeostasis during M. tuberculosis infection. Current opinion in microbiology. 2016;29.
- 669 33. Barisch C, Soldati T. Breaking fat! How mycobacteria and other intracellular pathogens  
670 manipulate host lipid droplets. Biochimie. 2017;141.
- 671 34. Geremew D, Melku M, Endalamaw A, Woldu B, Fasil A, Negash M, et al. Tuberculosis  
672 and its association with CD4 + T cell count among adult HIV positive patients in Ethiopian  
673 settings: a systematic review and meta-analysis. BMC infectious diseases. 2020;20(1).
- 674 35. Cowley SC, Elkins KL. CD4+ T cells mediate IFN-gamma-independent control of  
675 Mycobacterium tuberculosis infection both in vitro and in vivo. Journal of Immunology.  
676 2003;171(9):4689-99.
- 677 36. Shim D, Kim H, Shin SJ. Mycobacterium tuberculosis Infection-Driven Foamy  
678 Macrophages and Their Implications in Tuberculosis Control as Targets for Host-Directed  
679 Therapy. Frontiers in immunology. 2020;11.
- 680 37. Sarathy JP, Dartois V. Caseum: a Niche for Mycobacterium tuberculosis Drug-Tolerant  
681 Persisters. Clinical microbiology reviews. 2020;33(3).

- 682 38. Mishra BB, Rathinam VAK, Martens GW, Martinot AJ, Kornfeld H, Fitzgerald KA, et  
683 al. Nitric oxide controls the immunopathology of tuberculosis by inhibiting NLRP3  
684 inflammasome-dependent processing of IL-1 $\beta$ . *Nature Immunology*. 2013;14(1):52-60.
- 685 39. Mishra BB, Lovewell RR, Olive AJ, Zhang G, Wang W, Eugenin E, et al. Nitric oxide  
686 prevents a pathogen-permissive granulocytic inflammation during tuberculosis. *Nature*  
687 *Microbiology*. 2017;2:17072.
- 688 40. Choi JK, Kim KH, Park SR, Choi BH. Granulocyte macrophage colony-stimulating  
689 factor shows anti-apoptotic activity via the PI3K-NF- $\kappa$ B-HIF-1 $\alpha$ -survivin pathway in mouse  
690 neural progenitor cells. *Molecular neurobiology*. 2014;49(2).
- 691 41. Roda JM, Sumner LA, Evans R, Phillips GS, Marsh CB, Eubank TD. Hypoxia-inducible  
692 factor-2 $\alpha$  regulates GM-CSF-derived soluble vascular endothelial growth factor receptor 1  
693 production from macrophages and inhibits tumor growth and angiogenesis. *Journal of*  
694 *immunology (Baltimore, Md : 1950)*. 2011;187(4).
- 695 42. Wong AO, Marthi M, Mendel ZI, Gregorka B, Swanson MS, Swanson JA, et al.  
696 Renitence vacuoles facilitate protection against phagolysosomal damage in activated  
697 macrophages. <https://doi.org/10.1091/mbcE17-07-0486>. 2017.
- 698 43. Davis MJ, Gregorka B, Gestwicki JE, Swanson JA. Inducible Renitence Limits *Listeria*  
699 *monocytogenes* Escape from Vacuoles in Macrophages. 2012.
- 700 44. Wong AO, Marthi M, Haag A, Owusu IA, Wobus CE, Swanson JA. Macrophage  
701 inflammatory state influences susceptibility to lysosomal damage. *Journal of leukocyte biology*.  
702 2021.
- 703 45. Schnettger L, Rodgers A, Repnik U, Lai RP, Pei G, Verdoes M, et al. A Rab20-  
704 Dependent Membrane Trafficking Pathway Controls *M. tuberculosis* Replication by Regulating  
705 Phagosome Spaciousness and Integrity. *Cell host & microbe*. 2017;21(5).
- 706 46. Du Bruyn E, Ruzive S, Lindestam Arlehamn CS, Sette A, Sher A, Barber DL, et al.  
707 *Mycobacterium tuberculosis*-specific CD4 T cells expressing CD153 inversely associate with  
708 bacterial load and disease severity in human tuberculosis. *Mucosal Immunology*.  
709 2020;14(2):491-9.
- 710 47. Guilliams M, De Kleer I, Henri S, Post S, Vanhoutte L, De Prijck S, et al. Alveolar  
711 macrophages develop from fetal monocytes that differentiate into long-lived cells in the first  
712 week of life via GM-CSF. *The Journal of Experimental Medicine*. 2013;210(10):1977-92.
- 713 48. Dranoff G, Crawford AD, Sadelain M, Ream B, Rashid A, Bronson RT, et al.  
714 Involvement of granulocyte-macrophage colony-stimulating factor in pulmonary homeostasis.  
715 *Science*. 1994;264(5159):713-6.
- 716 49. Shi Y, Liu CH, Roberts AI, Das J, Xu G, Ren G, et al. Granulocyte-macrophage colony-  
717 stimulating factor (GM-CSF) and T-cell responses: what we do and don't know. *Cell Research*.  
718 2006;16(2):126-33.

- 719 50. Wada H, Noguchi Y, Marino MW, Dunn AR, Old LJ. T cell functions in  
720 granulocyte/macrophage colony-stimulating factor deficient mice. *Proceedings of the National*  
721 *Academy of Sciences of the United States of America*. 1997;94(23).
- 722 51. Ji Q, Gondek D, Hurwitz AA. Provision of granulocyte-macrophage colony-stimulating  
723 factor converts an autoimmune response to a self-antigen into an antitumor response. *Journal of*  
724 *immunology (Baltimore, Md : 1950)*. 2005;175(3).
- 725 52. Gangi E, Vasu C, Cheatem D, Prabhakar BS. IL-10-producing CD4+CD25+ regulatory T  
726 cells play a critical role in granulocyte-macrophage colony-stimulating factor-induced  
727 suppression of experimental autoimmune thyroiditis. *Journal of immunology (Baltimore, Md :*  
728 *1950)*. 2005;174(11).
- 729 53. Sonderegger I, Iezzi G, Maier R, Schmitz N, Kurrer M, Kopf M. GM-CSF mediates  
730 autoimmunity by enhancing IL-6-dependent Th17 cell development and survival. *The Journal of*  
731 *experimental medicine*. 2008;205(10).
- 732 54. Kaushansky K, Lopez JA, Brown CB. Role of carbohydrate modification in the  
733 production and secretion of human granulocyte macrophage colony-stimulating factor in  
734 genetically engineered and normal mesenchymal cells. *Biochemistry*. 1992;31(6).
- 735 55. Cebon J, Nicola N, Ward M, Gardner I, Dempsey P, Layton J, et al. Granulocyte-  
736 macrophage colony stimulating factor from human lymphocytes. The effect of glycosylation on  
737 receptor binding and biological activity. *The Journal of biological chemistry*. 1990;265(8).
- 738 56. Deguine J, Wei J, Barbalat R, Gronert K, Barton GM. Local TNFR1 Signaling Licenses  
739 Murine Neutrophils for Increased TLR-Dependent Cytokine and Eicosanoid Production. *Journal*  
740 *of immunology (Baltimore, Md : 1950)*. 2017;198(7).
- 741 57. Burke TP, Engström P, Chavez RA, Fonbuena JA, Vance RE, Welch MD.  
742 Inflammasome-mediated antagonism of type I interferon enhances *Rickettsia* pathogenesis.  
743 *Nature Microbiology*. 2020;5(5):688-96.
- 744 58. Liu X, Boyer MA, Holmgren AM, Shin S. Legionella-Infected Macrophages Engage the  
745 Alveolar Epithelium to Metabolically Reprogram Myeloid Cells and Promote Antibacterial  
746 Inflammation. *Cell host & microbe*. 2020;28(5).
- 747 59. Gallegos AM, Pamer EG, Glickman MS. Delayed protection by ESAT-6-specific effector  
748 CD4+ T cells after airborne *M. tuberculosis* infection. *The Journal of Experimental Medicine*.  
749 2008;205(10):2359-68.
- 750 60. Moguche AO, Musvosvi M, Penn-Nicholson A, Plumlee CR, Mearns H, Geldenhuys H,  
751 et al. Antigen Availability Shapes T Cell Differentiation and Function during Tuberculosis. *Cell*  
752 *Host & Microbe*. 2017;21(6):695-706.e5.
- 753 61. Brinkman EK, Chen T, Amendola M, van Steensel B. Easy quantitative assessment of  
754 genome editing by sequence trace decomposition. *Nucleic Acids Research*. 2014;42(22):e168.

- 755 62. Rosenberg OS, Dovala D, Li X, Connolly L, Bendebury A, Finer-Moore J, et al.  
756 Substrates Control Multimerization and Activation of the Multi-Domain ATPase Motor of Type  
757 VII Secretion. *Cell*. 2015;161(3):501-12.
- 758 63. Roberts AW, Popov LM, Mitchell G, Ching KL, Licht DJ, Golovkine G, et al. Cas9+  
759 conditionally-immortalized macrophages as a tool for bacterial pathogenesis and beyond. *eLife*.  
760 2019;8.
- 761



## Figure 1

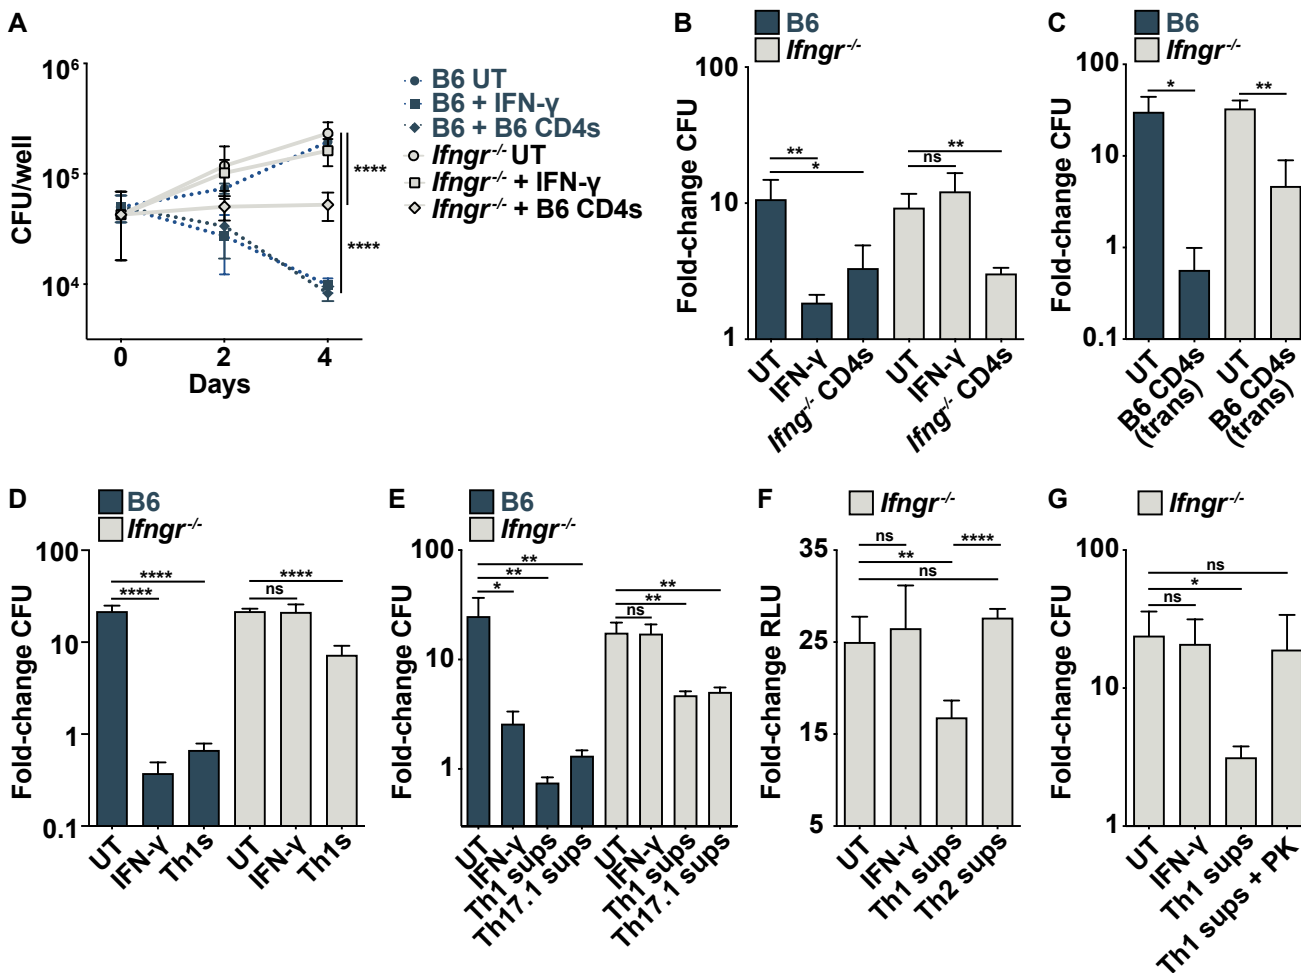

**Fig 1. Lung-derived and in vitro-differentiated CD4 T cells control *M. tuberculosis* growth independent of IFN- $\gamma$ .** (A) CFU/well at d 0, 2 and 4 postinfection for wild-type and *Ifngr*<sup>-/-</sup> BMDMs co-cultured with lung-derived wild-type CD4 T cells. (B) CFU fold-change at d 5 postinfection for wild-type and *Ifngr*<sup>-/-</sup> BMDMs co-cultured with lung-derived *Ifngr*<sup>-/-</sup> CD4 T cells. (C) CFU fold-change at d 4 postinfection for wild-type and *Ifngr*<sup>-/-</sup> BMDMs cultured with wild-type lung-derived CD4 T cells in transwells. (D) CFU fold-change at d 5 postinfection for wild-type and *Ifngr*<sup>-/-</sup> BMDMs co-cultured with *in vitro* differentiated Th1 cells. (E) CFU fold-change at d 4 postinfection for wild-type and *Ifngr*<sup>-/-</sup> BMDMs treated with Th1 or Th17.1 supernatants (sups). (F) RLU fold-change at d 5 postinfection for *Ifngr*<sup>-/-</sup> BMDMs treated with Th1 or Th2 supernatants. (G) CFU fold-change at d 5 postinfection for *Ifngr*<sup>-/-</sup> BMDMs treated with Th1 supernatants +/- Proteinase K (PK). Figures are representative of two (G) or three or more (A)-(F) experiments. Error bars are SD from four replicate wells (A)-(B), (D)-(G) or three replicate wells (C), \*p<0.05, \*\*p<0.01, \*\*\*\*p<0.0001 by unpaired t-test.

**Figure 2**

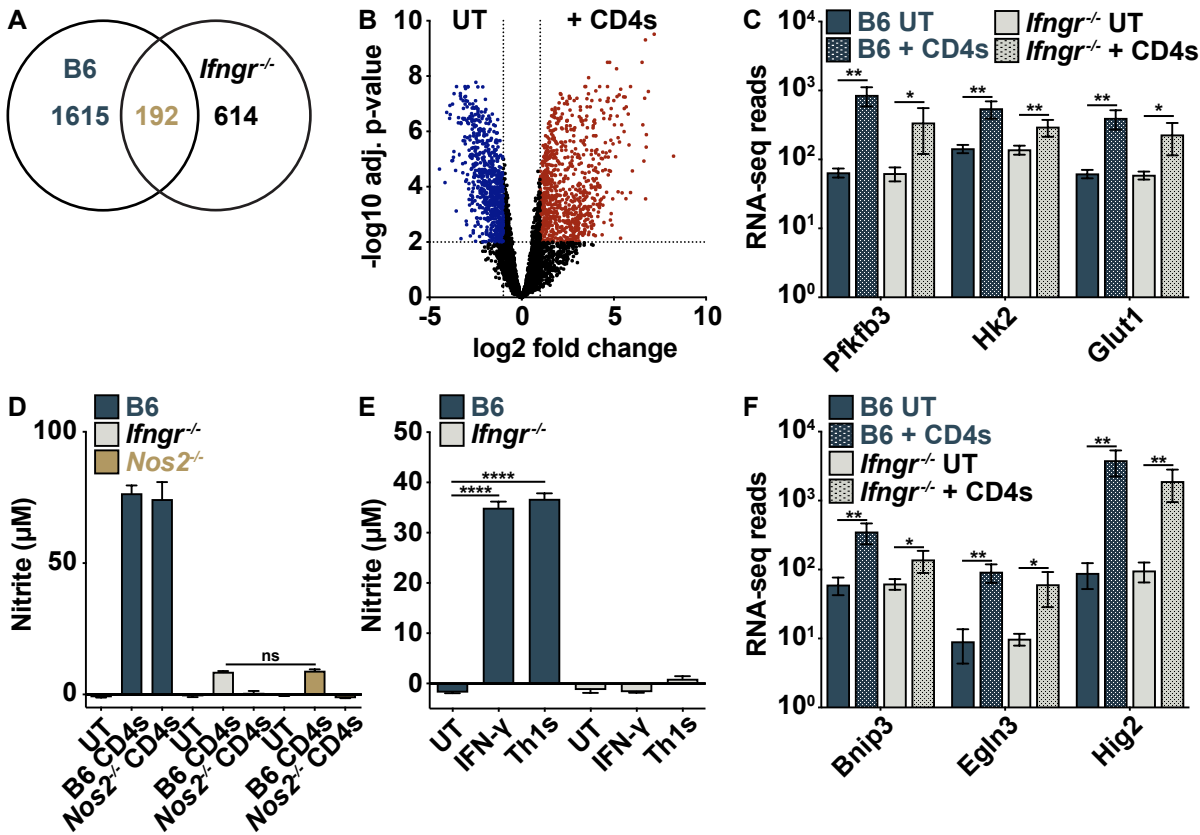

**Fig 2. CD4 T cells induce an IFN- $\gamma$ - and NO-independent increase in glycolytic gene expression.** (A)-(B) RNA-seq at 24 h postinfection for wild-type and *Ifngr*<sup>-/-</sup> BMDMs co-cultured with wild-type lung CD4 T cells. (A) Venn diagram showing overlap of CD4 T cell-regulated genes in wild-type and *Ifngr*<sup>-/-</sup> BMDMs with at least 2-fold change in gene expression and adj. p-value >0.05 relative to UT. (B) Volcano plot of genes in *Ifngr*<sup>-/-</sup> BMDMs showing >2-fold change in gene expression and adj. p-value >0.05 between UT and CD4 T cell co-culture. (C) RNA-seq reads of glycolytic genes. (D) Griess assay at 48 h postinfection for wild-type, *Ifngr*<sup>-/-</sup>, and *Nos2*<sup>-/-</sup> BMDMs co-cultured with a 10:1 ratio of wild-type or *Nos2*<sup>-/-</sup> lung-derived CD4 T cells. (E) Griess assay at 48 h postinfection for wild-type and *Ifngr*<sup>-/-</sup> BMDMs co-cultured with Th1 cells. (F) RNA-seq reads of HIF-1 $\alpha$  target genes. Figures are representative of two (E) or three (D) independent experiments. Error bars are SD from three independent experiments (C), (F) or four replicate wells (D)-(E), \*p<0.05, \*\*p<0.01, \*\*\*\*p<0.0001 by unpaired t-test.

### Figure 3

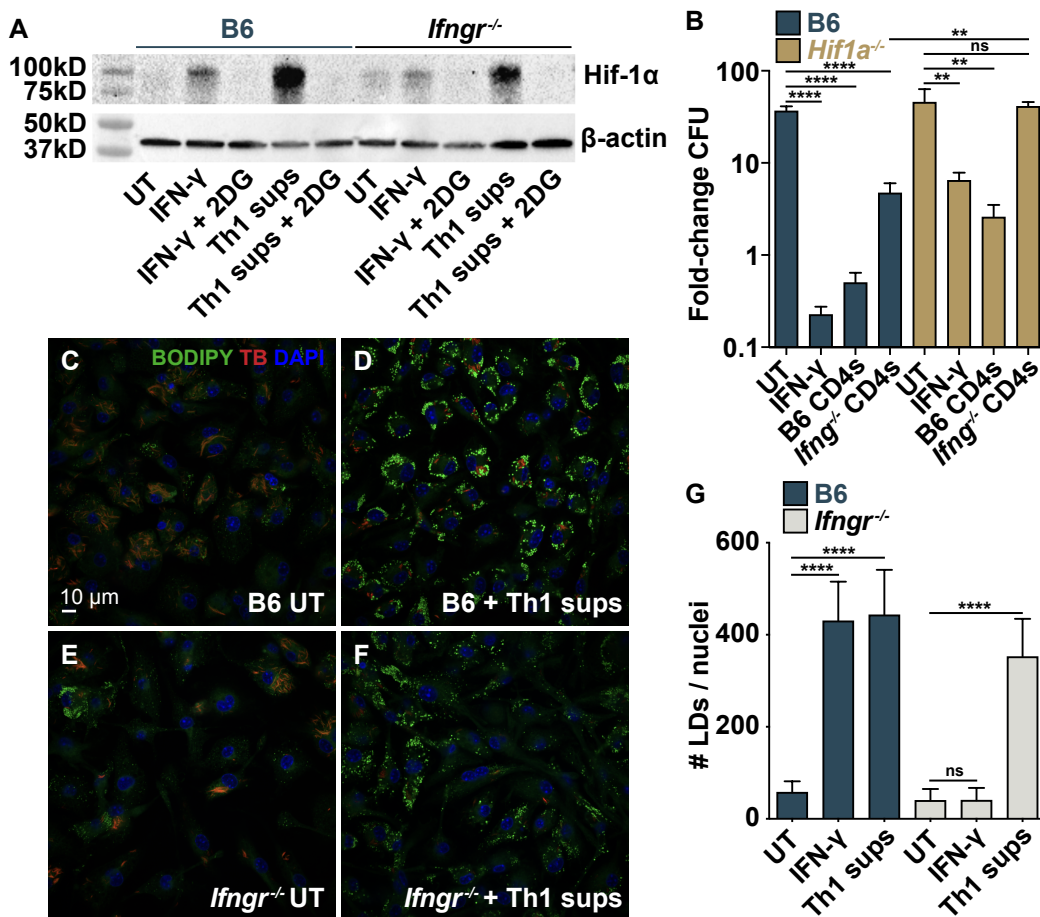

**Fig 3. IFN- $\gamma$ -independent control requires the transcription factor HIF-1 $\alpha$ .** (A) Western blot for HIF-1 $\alpha$  on cell lysates 12 h postinfection for wild-type and *Ifngr*<sup>-/-</sup> BMDMs treated with Th1 supernatants and 2-DG. (B) CFU fold-change at d 5 postinfection for wild-type and *Hif1a*<sup>-/-</sup> BMDMs co-cultured with wild-type or *Ifngr*<sup>-/-</sup> lung-derived CD4 T cells. (C)-(F) Microscopy for host lipid droplets (LDs) at d 3 postinfection for wild-type and *Ifngr*<sup>-/-</sup> BMDMs treated with Th1 supernatants. (G) Quantification of (C)-(F) for average number of LDs per BMDM. Figures are representative of two (A) or three (B) independent experiments or 48 images from four replicate wells (G), \*\*p<0.01, \*\*\*\*p<0.0001 by unpaired t-test.

## Figure 4

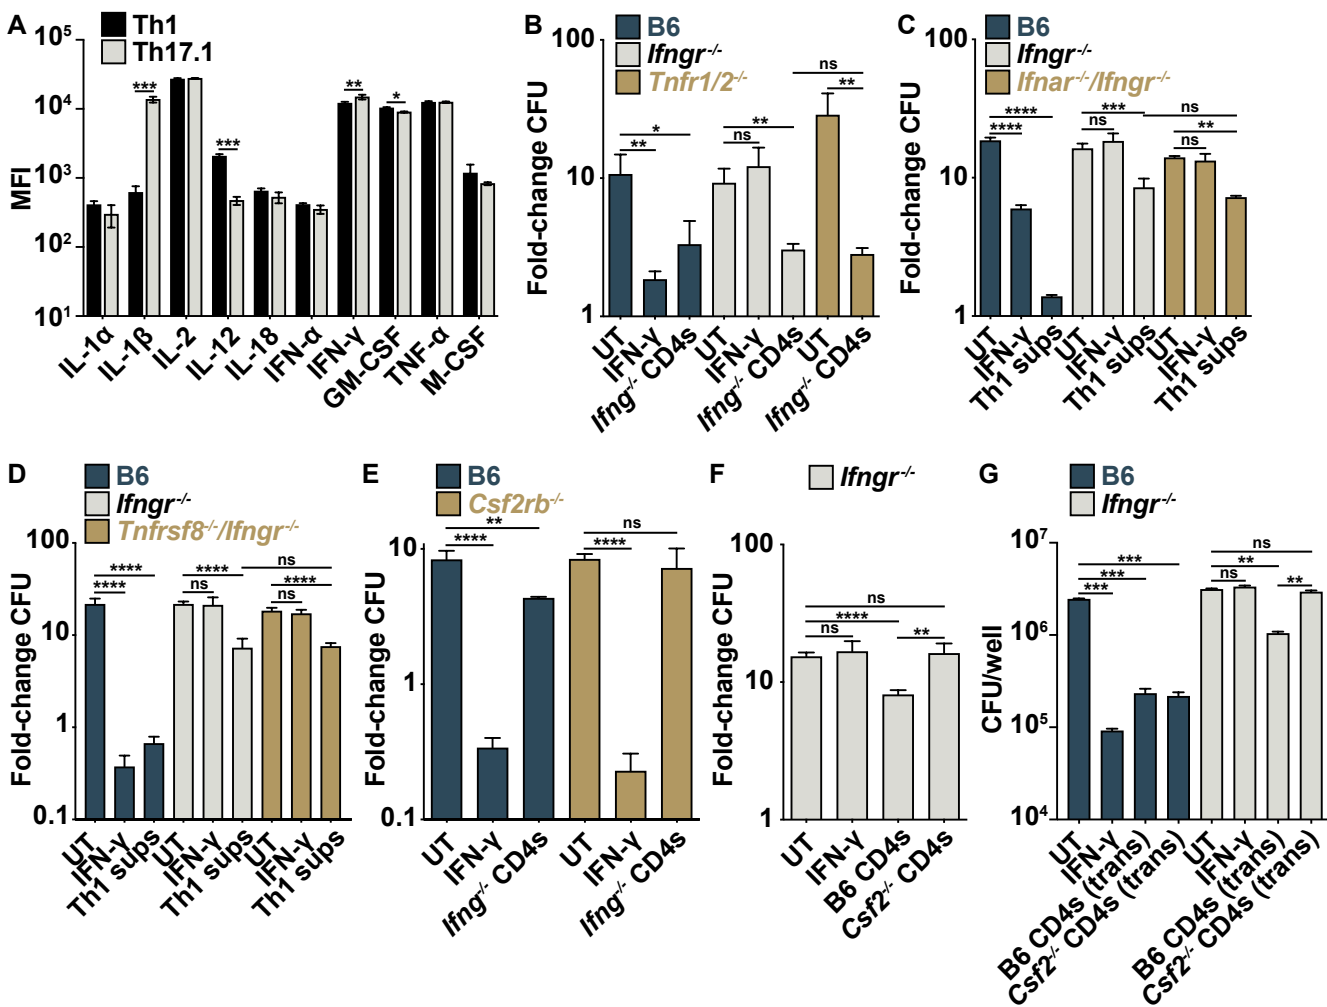

**Fig 4. IFN- $\gamma$ -independent control of *M. tuberculosis* requires CD4 T cell-derived GM-CSF.** (A) Mean fluorescence intensity (MFI) of select cytokines in *in vitro* differentiated Th1 and Th17.1 supernatants. (B) CFU fold-change at d 5 postinfection for wild-type, *Ifngr*<sup>-/-</sup>, and *Tnfr1/2*<sup>-/-</sup> BMDMs co-cultured with *Ifng*<sup>-/-</sup> lung-derived CD4 T cells. (C) CFU fold-change at d 5 postinfection for wild-type, *Ifngr*<sup>-/-</sup>, and *Ifnar*<sup>-/-</sup>/*Ifngr*<sup>-/-</sup> BMDMs treated with Th1 supernatants. (D) CFU fold-change at d 5 postinfection for wild-type, *Ifngr*<sup>-/-</sup> and *Tnfrsf8*<sup>-/-</sup>/*Ifngr*<sup>-/-</sup> double-knockout BMDMs treated with Th1 supernatants. (E) CFU fold-change at d 5 postinfection for wild-type and *Csf2rb*<sup>-/-</sup> BMDMs co-cultured with *Ifng*<sup>-/-</sup> lung-derived CD4 T cells. (F) CFU fold-change at d 5 postinfection for *Ifngr*<sup>-/-</sup> BMDMs co-cultured with wild-type or *Csf2*<sup>-/-</sup> lung-derived CD4 T cells. (G) CFU-fold change at d 4 postinfection for wild-type and *Ifngr*<sup>-/-</sup> BMDMs cultured with wild-type or *Csf2*<sup>-/-</sup> lung-derived CD4 T cells in transwells. Figures represent seven (Th1) or three (Th17.1) biological replicates (A) or are representative of two (B), (D), (G) or at least three (C), (F) independent experiments. Error bars are SD from biological replicates (A), four replicate wells (B)-(F) or three replicate wells (G), \* $p < 0.05$ , \*\* $p < 0.01$ , \*\*\* $p < 0.001$ , \*\*\*\* $p < 0.0001$  by unpaired t-test.

## Figure 5

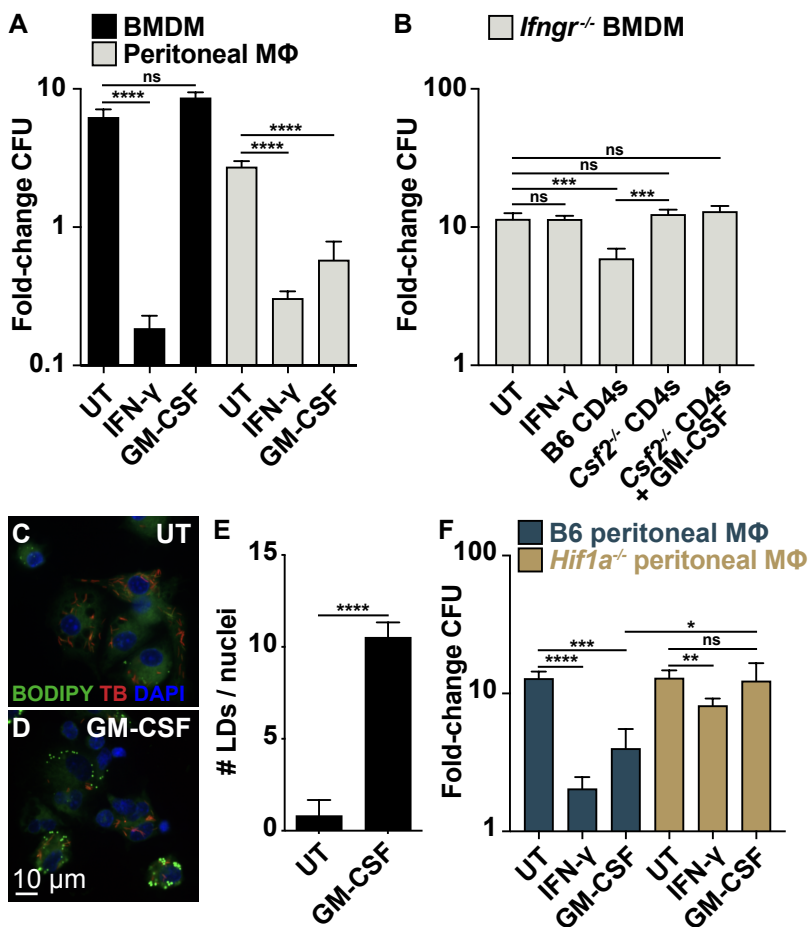

**Fig 5. GM-CSF activates HIF-1 $\alpha$  to restrict *M. tuberculosis* in peritoneal macrophages. (A)** CFU fold-change at d 4 postinfection for BMDMs and peritoneal macrophages treated with GM-CSF. **(B)** CFU fold-change at d 5 postinfection for *Ifngr*<sup>-/-</sup> BMDMs co-cultured with wild-type or *Csf2*<sup>-/-</sup> lung CD4 T cells and GM-CSF. **(C)-(D)** Microscopy for host lipid droplets (LDs) at d 3 postinfection for wild-type peritoneal macrophages treated with GM-CSF. **(E)** Quantification of (C)-(D) for average number of LDs per peritoneal macrophage treated with GM-CSF. **(F)** CFU fold-change at d 4 postinfection for wild-type and *Hif1a*<sup>-/-</sup> peritoneal macrophages treated with GM-CSF. All figures are representative of three or more experiments. Error bars are SD from four replicate wells (A)-(B), (F) or 48 images from four replicate wells (E), \*p<0.05, \*\*p<0.01, \*\*\*p<0.001, \*\*\*\*p<0.0001 by unpaired t-test.

## Figure 6

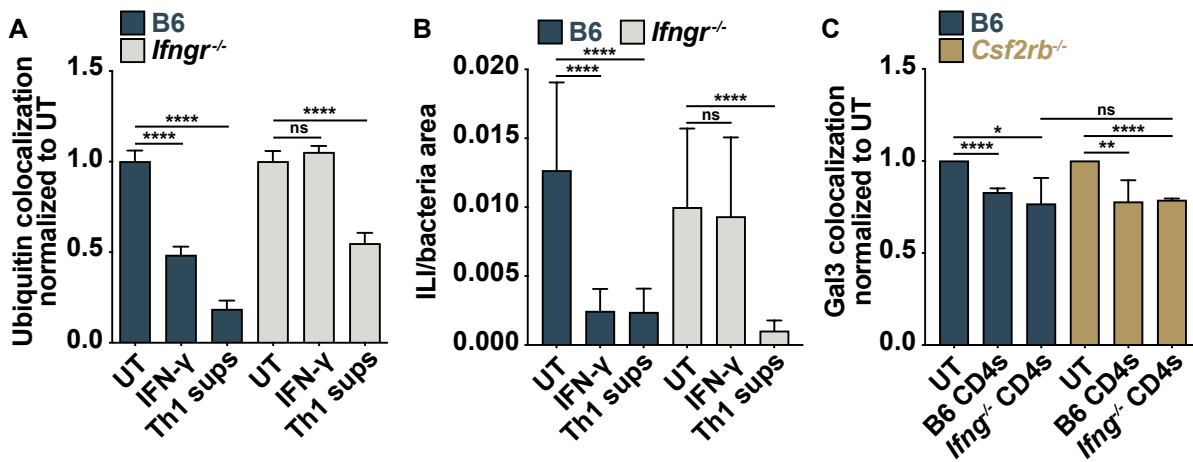

**Fig 6. CD4 T cells reduces cytosolic access of *M. tuberculosis* independent of IFN- $\gamma$  and GM-CSF.** (A) Percent colocalization between bacteria and ubiquitinated proteins at 8 h postinfection for wild-type and *Ifngr*<sup>-/-</sup> BMDMs treated with Th1 supernatants, normalized to untreated for each BMDM genotype. (B) Microscopy for ILI intensity per bacteria area at d 3 postinfection for wild-type and *Ifngr*<sup>-/-</sup> BMDMs treated with Th1 supernatants. (C) Percent colocalization between bacteria and Galectin 3 (Gal3) at 8 h postinfection for wild-type and *Csf2rb*<sup>-/-</sup> BMDMs cultured with lung-derived wild-type or *Ifngr*<sup>-/-</sup> CD4 T cells in transwells, normalized to untreated for each BMDM genotype. Error bars are SD from 48 images from four replicate wells (A)-(B) or from four replicate wells with 9 images per well (C), \* $p < 0.05$ , \*\* $p < 0.01$ , \*\*\*\* $p < 0.0001$  by unpaired t-test.

## **Supplemental Information: Extended Methods, References, and Figures S1 – S5.**

### **IFN- $\gamma$ -independent control of *M. tuberculosis* requires CD4 T cell-derived GM-CSF and activation of HIF-1 $\alpha$**

Erik Van Dis<sup>a,+</sup>, Huntly M Morrison<sup>a</sup>, Daniel M Fines<sup>a</sup>, Janet Peace Babirye<sup>a</sup>, Lily H McCann<sup>b</sup>, Sagar Rawal<sup>b</sup>, Jeffery S Cox<sup>a</sup>, and Sarah A Stanley<sup>a,b,#</sup>

<sup>a</sup>Department of Molecular and Cell Biology, Division of Immunology and Pathogenesis, University of California, Berkeley, Berkeley, California, USA

<sup>b</sup>School of Public Health, Division of Infectious Diseases and Vaccinology, University of California, Berkeley, Berkeley, California, USA

<sup>+</sup>Current address: Departments of Immunology and Medicine, University of Washington, Seattle, Washington, USA

<sup>#</sup>Corresponding author, [sastanley@berkeley.edu](mailto:sastanley@berkeley.edu)

Page S2: Extended Methods, References

Page S3: Figure S1

Page S4: Figure S2

Page S5: Figure S3

Page S6: Figure S4

Page S7: Figure S5

## Extended Methods

### Reagents

GM-CSF expressed in *E. coli* was obtained from R&D Systems (415-ML) and GM-CSF expressed in Chinese hamster ovary cells was obtained from MedChemExpress (HY-P7069) and used at 10 ng/mL. Armenian hamster anti-mouse CD40 (102907) was obtained from Biologend and used at 20 µg/mL. Glucose uptake was determined using a glucose (HK) assay kit from Sigma-Aldrich (GAHK20) according to the manufacturer's protocol.

### Transcription factor prediction

oPOSSUM has been described previously (1) and was used to predict macrophage transcription factors regulated by CD4 T cells during IFN- $\gamma$  independent control of infection. oPOSSUM analysis was run on all genes in the RNAseq data found to be expressed at a higher level in *Ifngr*<sup>-/-</sup> BMDMs after co-culture with lung-derived CD4 T cells compared to UT.

### GM-CSF ELISA

GM-CSF concentration in cell culture supernatant was determined using the Mouse GM-CSF Quantikine ELISA kit from R&D Systems (MGM00) according to the manufacturer's protocol.

### GM-CSF western blot

C7 Th1 supernatants were generated in OptiMEM T cell media as described. Protein from 1 mL supernatant was concentrated by TCA precipitation and compared to a dose response of recombinant GM-CSF by SDS-PAGE using precast 4-20% Criterion TGX protein gels from Bio-Rad Laboratories (5671093), rabbit polyclonal Ab to mouse GM-CSF from Abcam (ab9741), and an HRP-conjugated secondary antibody. Blots were developed as described in the main text.

### References

1. Ho Sui SJ, Mortimer JR, Arenillas DJ, Brumm J, Walsh CJ, Kennedy BP, Wasserman WW. 2005. oPOSSUM: identification of over-represented transcription factor binding sites in co-expressed genes. *Nucleic Acids Research* 33:3154-3164.



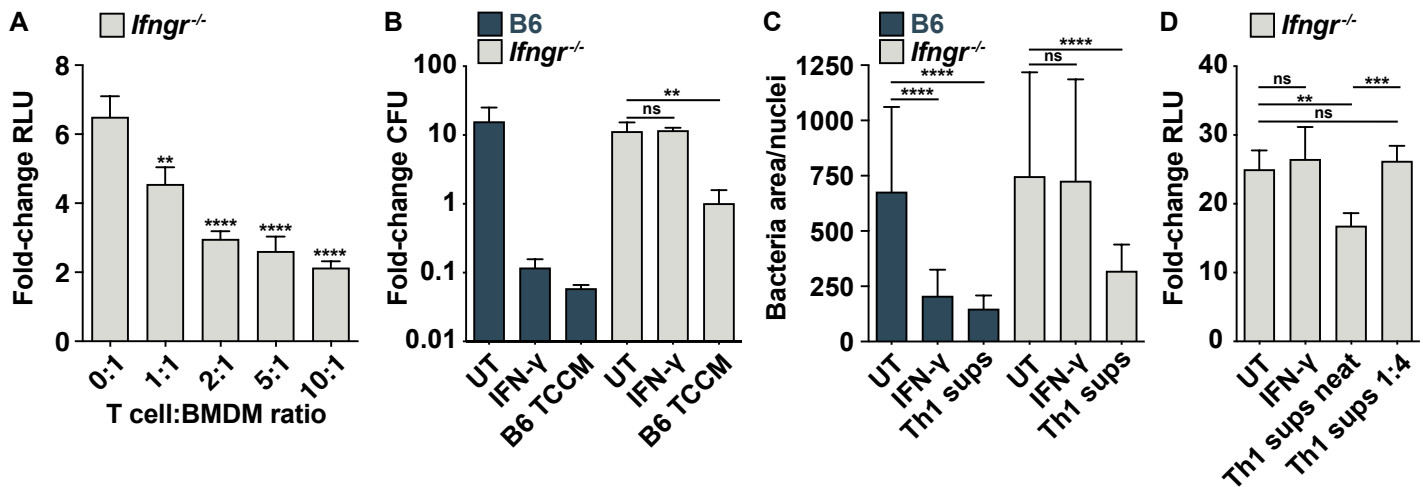

**Figure S1** Related to Fig 1, lung-derived and *in vitro*-differentiated CD4 T cells control *M. tuberculosis* growth independent of IFN- $\gamma$ . **(A)** RLU fold-change at d 4 postinfection for *Ifngr*<sup>-/-</sup> BMDMs co-cultured with the indicated ratios of lung-derived wild-type CD4 T cells to BMDMs, p-values relative to UT. **(B)** CFU fold-change at d 5 postinfection for wild-type and *Ifngr*<sup>-/-</sup> BMDMs treated with conditioned media from lung-derived wild-type CD4 T cells (TCCM). **(C)** Microscopy for bacterial replication at d 3 postinfection for wild-type and *Ifngr*<sup>-/-</sup> BMDMs treated with Th1 supernatants. **(D)** RLU fold-change at d 4 postinfection for *Ifngr*<sup>-/-</sup> BMDMs treated with neat or diluted Th1 supernatants. Figures are representative of two (A), (D) or at least three (B)-(C) independent experiments. Error bars are SD from four replicate wells (A)-(B), (D) or 48 images from 4 replicate wells (C), \*\*p<0.01, \*\*\*p<0.001, \*\*\*\*p<0.0001 by unpaired t-test.

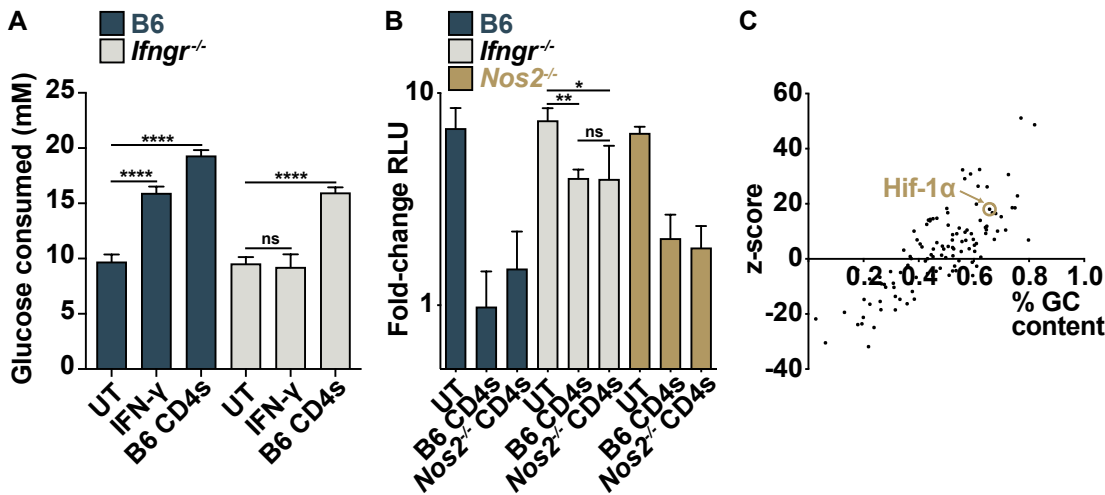

**Figure S2** Related to Fig 2, CD4 T cells induce an IFN- $\gamma$ - and NO-independent increase in glycolytic gene expression. **(A)** Glucose consumption at 48 h postinfection for wild-type and *Ifngr*<sup>-/-</sup> BMDMs co-cultured with lung-derived wild-type CD4 T cells. **(B)** RLU fold-change at d 6 postinfection for wild-type, *Ifngr*<sup>-/-</sup> and *Nos2*<sup>-/-</sup> BMDMs co-cultured with a 10:1 ratio of lung-derived wild-type or *Nos2*<sup>-/-</sup> CD4 T cells. **(C)** oPOSSUM bioinformatic prediction of transcription factors responsible for regulation of all genes found by RNA sequencing to be expressed at a higher level in *Ifngr*<sup>-/-</sup> BMDMs after co-culture with lung-derived CD4 T cells compared to UT. Figures represent data from three independent experiments (C) or are representative of two independent experiments (A)-(B). Error bars are SD from four replicate wells, \*p < 0.05, \*\*p < 0.01, \*\*\*\*p < 0.0001 by unpaired t-test.

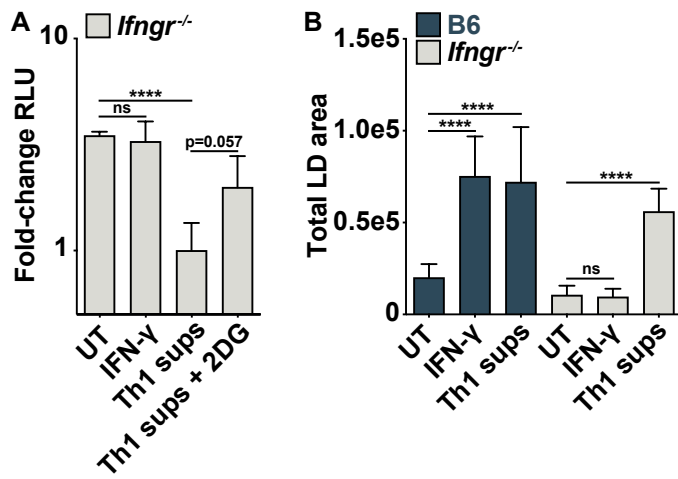

**Figure S3** Related to Fig 3, IFN- $\gamma$ -independent control of *M. tuberculosis* requires the macrophage transcription factor HIF-1 $\alpha$ . **(A)** RLU fold-change at d 4 postinfection for wild-type and *Ifngr*<sup>-/-</sup> BMDMs treated with Th1 supernatants and 2-DG. **(B)** Quantification of (Fig 3C-F) for total area of LDs in the imaging field. Figures are representative of two (A) or three (B) independent experiments. Error bars are SD from four replicate wells (A) or 48 images from four replicate wells (B), \*\*\*\*p<0.0001 by unpaired t-test.

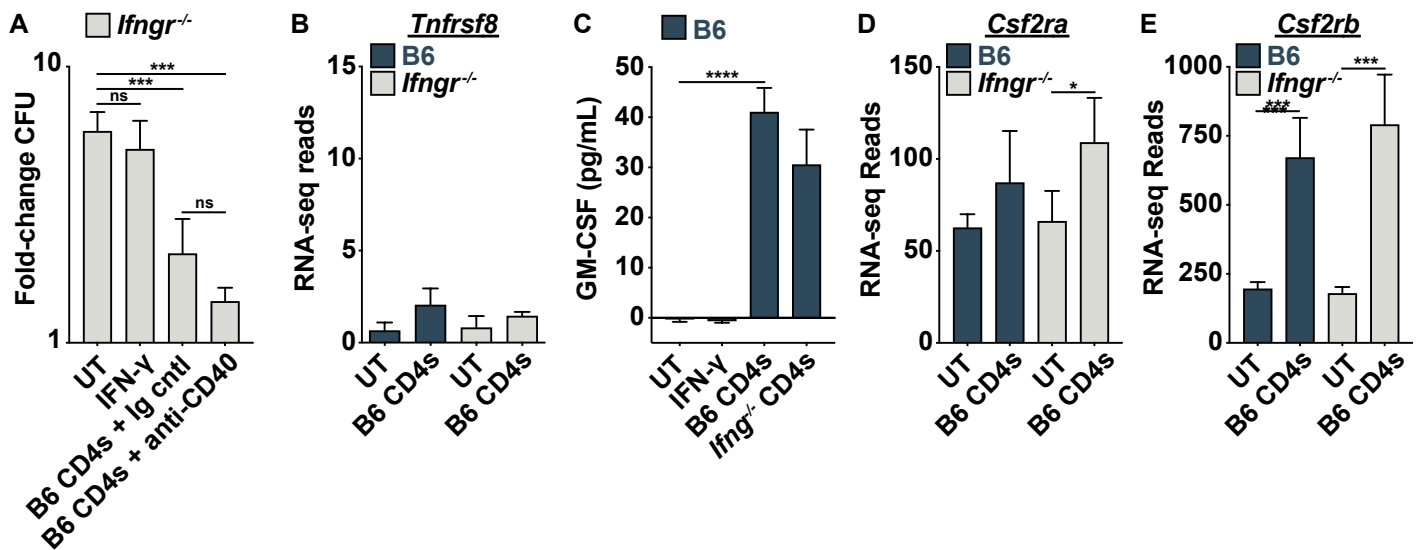

**Figure S4** Related to Fig 4, IFN- $\gamma$ -independent control of *M. tuberculosis* requires CD4 T cell-derived GM-CSF. **(A)** CFU fold-change at d 5 postinfection for *Ifngr*<sup>-/-</sup> BMDMs co-cultured with lung-derived wild-type CD4 T cells and treated with anti-CD40. **(B)** RNA-seq reads of *Tnfrsf8* at 24 h postinfection in wild-type and *Ifngr*<sup>-/-</sup> BMDMs co-cultured with lung-derived CD4 T cells. **(C)** ELISA for GM-CSF concentration in lung CD4 co-culture supernatants at d 2 postinfection. **(D)-(E)** RNA-seq reads of (D) *Csf2ra* and (E) *Csf2rb* at 24 h postinfection in wild-type and *Ifngr*<sup>-/-</sup> BMDMs co-cultured with lung-derived CD4 T cells. Figures show three biological replicates (B), (D)-(E) or are representative of three independent experiments (A), (C). Error bars are SD from three independent experiments (B), (D)-(E) or four replicate wells (A), (C), \* $p < 0.05$ , \*\*\* $p < 0.001$ , \*\*\*\* $p < 0.0001$  by unpaired t-test.

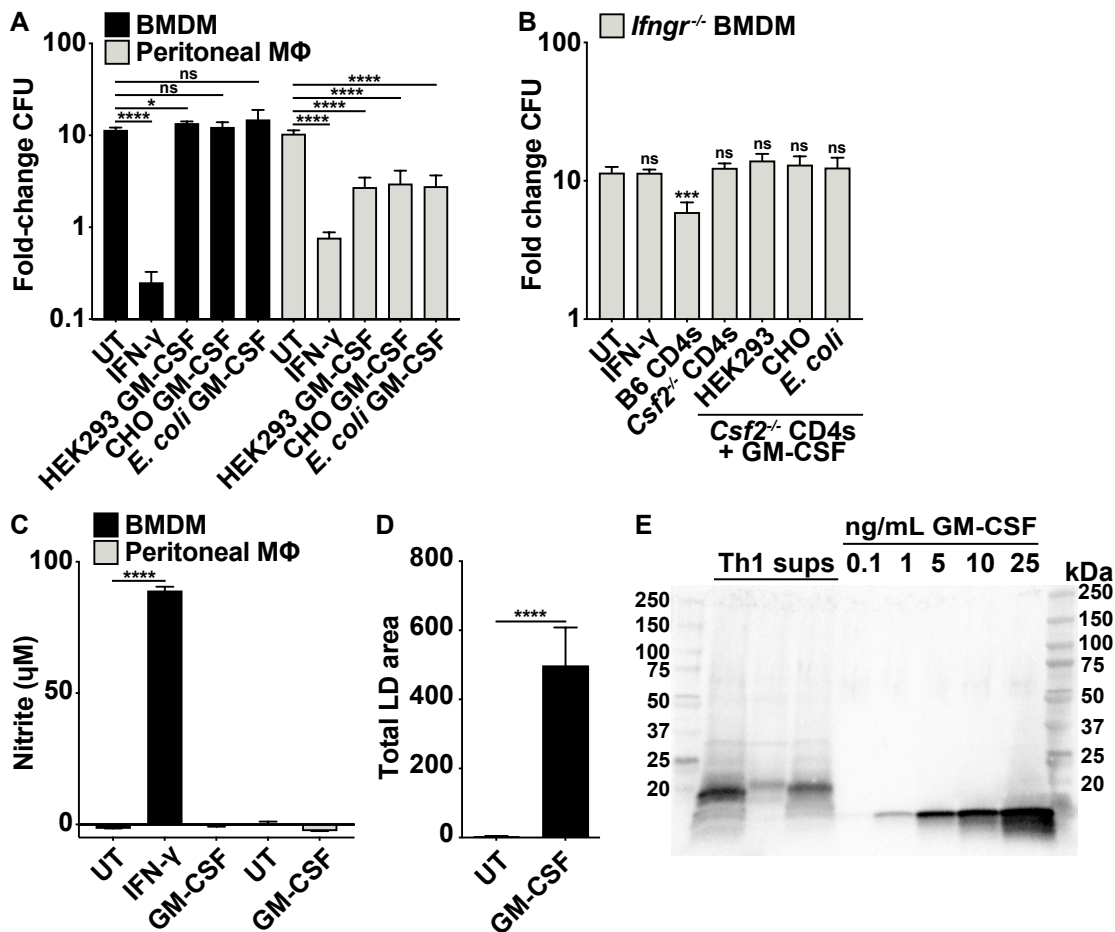

**Figure S5** Related to Fig 5, HIF-1 $\alpha$ -dependent restriction of *M. tuberculosis* by GM-CSF occurs only in peritoneal macrophages. **(A)** CFU fold-change at d 4 postinfection for BMDMs and peritoneal macrophages treated with GM-CSF derived from the indicated sources. **(B)** CFU fold-change at d 5 postinfection for *Ifngr*<sup>-/-</sup> BMDMs co-cultured with wild-type or *Csf2*<sup>-/-</sup> lung CD4 T cells and treated with GM-CSF derived from the indicated sources, p-values relative to UT. **(C)** Griess assay at 24 h postinfection for BMDMs and peritoneal macrophages treated with GM-CSF. **(D)** Quantification of (Fig 5C-D) for total area of LDs in the imaging field of peritoneal macrophages treated with GM-CSF. **(E)** Western blot for GM-CSF comparing a dose response of recombinant GM-CSF to three biological replicates of 1mL TCA-precipitated C7 Th1 supernatants. Figures are representative of two (B)-(C) or at least three (A), (D)-(E) independent experiments. Error bars are SD from four replicate wells (A)-(C) or 48 images from four replicate wells (D), \*p<0.05, \*\*\*p<0.001, \*\*\*\*p<0.0001 by unpaired t-test.
